# Supplementary material for: A conditional random field based approach for high-accuracy part-of-speech tagging using language-independent features
Source: PeerJ Comput Sci. 2024 Dec 11;10:e2577. doi: 10.7717/peerj-cs.2577 (PMC11784857; doi:10.7717/peerj-cs.2577)
Supplement: Supplemental Information 3 [file peerj-cs-10-2577-s003.xlsx]

## Sheet: Sheet1
Word	English Translation	POS
راؤنڈ	round	NN
ٹیبل	table	NN
پر	on	PSP
مباحث	discussions	NN
سے	from	PSP
قبل	before	NN
ہم	we	PRP
کامن	Common	NNP
ویلتھ	Wealth	NNP
گیمس	Games	NNP
کی	of	PSP
آرگنائزنگ	organizing	JJ
کمیٹی	committee	NN
کے	of	PSP
برطرف	dismissed	JJ
شدہ	removed	JJ
چیرمین	chairman	NN
سریش	Suresh	NNP
کلماڈی	Kalmadi	NNP
پر	on	PSP
اےک	a	Q
بےروزگار	unemployed	JJ
شخص	person	NN
کے	with	PSP
چپل	slipper	NN
کے	through	PSP
ذریعہ	by means of	NN
حملہ	attack	NN
کا	of	PSP
ذکر	mention	NN
کریں	do	VBF
۔	.	SYM
یہ	this	PDM
واقعہ	incident	NN
اس	this	PDM
وقت	time	NN
پیش	occurred	NN
آیا	happened	VM
جب	when	PRP
کلماڈی	Kalmadi	NNP
پٹیالہ	Patiala	NNP
ہاؤز	House	NNP
کامپلکس	complex	NNP
میں	in	PSP
سی	C	NNP
ڈبلیو	W	NNP
جی	G	NNP
اسکام	scam	NN
سے	from	PSP
متعلق	related	JJ
مقدمہ	case	NN
کی	of	PSP
سماعت	hearing	NN
کے	of	PSP
بعد	after	NN
پولیس	police	NN
کے	under	PSP
پہرہ	escort	NN
میں	in	PSP
عدالت	court	NN
سے	from	PSP
باہر	outside	NN
نکل	exit	VM
رہے	were	VAUX
تھے	were	VAUX
۔	.	SYM
ان	them	PDM
دنوں	Days	NN
بااثر	Influential	JJ
سیاسی	political	JJ
شخصیتوں	Personalities	NN
کو	to	PSP
سی	C	NNP
بی	b	NNP
آئی	i	NNP
مختلف	different	JJ
اسکامس	Scams	NN
کے	of	PSP
الزامات	Charges	NN
میں	in	PSP
لاک اپ	Lock-up	NN
بھیج	Send	VM
رہی	remained	VAUX
ہے	Is	VAUX
۔	?	SYM
کلماڈی	Kalmadi	NNP
کو	to	PSP
کامن	Common	NNP
ویلتھ	wealth	NNP
گیمس	Games	NNP
میں	in	PSP
دھاندلیوں	rigging	NN
کے	of	PSP
الزام	allegation	NN
میں	in	PSP
گرفتار	arrested	JJ
کیا	what	VM
گیا	Was	VAUX
تھا	was	VAUX
PUNCT	PUNCT	punct
ان	them	PRP
پر	on	PSP
سوئٹزر	Switzer	NNP
لینڈ	Land	NNP
کی	of	PSP
کمپنی	company	NN
کو	to	PSP
غیرقانونی	Illegal	JJ
طور	condition	NN
پر	on	PSP
کنٹریکٹ	contract	NN
دینے	To	VM
کا	concerning	PSP
الزام	allegation	NN
ہے	Is	VM
۔	?	SYM
اس	this	PDM
اقدام	Step	NN
سے	from	PSP
سرکاری	Official	JJ
خزانہ	treasure	NN
پر	on	PSP
95	95	Q
کروڑ	Million	Q
روپیوں	rupees	NN
کا	concerning	PSP
خسارہ	deficit	NN
ہوا	air	VM
ہے	Is	VAUX
۔	?	SYM
سی	C	NNP
بی	b	NNP
آئی	i	NNP
نے	have	PSP
سریش	Suresh	NNP
کلماڈی	Kalmadi	NNP
کو	to	PSP
14	14	Q
دن	day	NN
کی	of	PSP
عدالتی	judicial	JJ
تحویل	Custody	NN
میں	in	PSP
دے	Give	VM
دیا	lamp	VAUX
تھا	was	VAUX
جو	who	PRP
حلقہ	circle	NN
پونے	Pune	NNP
لوک	lok	NNP
سبھا	sabha	NNP
سے	from	PSP
منتخب	chosen	JJ
کانگریس	Congress	NNP
کے	of	PSP
رکن	member	NN
لوک	lok	NNP
سبھا	sabha	NNP
ہیں	Are	VM
۔	?	SYM
ان	them	PRP
کے	of	PSP
ساتھ	together	NN
سرجیت	Surjit	NNP
لال	red	NNP
اور	and	CC
ایس	S	NNP
وی	V	NNP
پرساد	Prasad	NNP
کے	of	PSP
خلاف	against	PSP
دفعات	provisions	NN
120	120	NNP
(	(	SYM
ب	B	NNP
)	)	SYM
اور	and	CC
420	420	NNP
کے	of	PSP
علاوہ	moreover	PSP
انسداد	Counter	NN
رشوت	bribe	NN
ستانی	strife	NN
کی	of	PSP
دیگر	other	JJ
دفعات	provisions	NN
کے	of	PSP
تحت	Under	PSP
مقدمات	Cases	NN
درج	The	JJ
کئے	made	VM
گئے	went	VAUX
ہیں	Are	VAUX
۔	?	SYM
سریش	Suresh	NNP
کلماڈی	Kalmadi	NNP
پر	on	PSP
اےک	a	Q
شخص	person	NN
کے	of	PSP
چپل	sandal	NN
پھینک	Throw	VM
کر	do	VAUX
مارنے	Kill	VM
سے	from	PSP
ایسا	such	PRP
معلوم	known	JJ
ہوتا	would have	VM
ہے	Is	VAUX
کہ	that	CC
عوام	Public	NN
کو	to	PSP
اب	now	PRP
سیاسی	political	JJ
قائدین	Leaders	NN
کے	of	PSP
خلاف	against	PSP
اپنے	Your	PRP
غم	grief	NN
و	and	CC
غصہ	anger	NN
اور	and	CC
مایوسی	Frustration	NN
کا	concerning	PSP
اظہار	declaration	NN
کرنے	To	VM
کا	concerning	PSP
موقع	opportunity	NN
فراہم	Provide	JJ
ہو	be	VM
گیا	Was	VAUX
ہے	Is	VAUX
۔	?	SYM
سریش	Suresh	NNP
کلماڈی	Kalmadi	NNP
کی	of	PSP
گرفتاری	arrest	NN
کے	of	PSP
ذریعہ	By	PSP
سی	C	NNP
بی	b	NNP
آئی	i	NNP
نے	have	PSP
اےک	a	Q
قدم	step	NN
اٹھایا	picked up	VM
ہے	Is	VAUX
کیونکہ	because	CC
کرپشن	Corruption	NN
کے	of	PSP
انکشافات	Disclosures	NN
کے	of	PSP
بعد	After	NN
بھی	also	RP
کانگریس	Congress	NNP
دولت	wealth	NNP
مشترکہ	common	NNP
کھیلوں	Sports	NN
کے	of	PSP
اختتام	the end	NN
کے	of	PSP
کئی	several	Q
ماہ	month	NN
تک	until	PSP
صرف	only	RP
زبانی	oral	JJ
دعوے	Claim	NN
کر	do	VM
رہی	remained	VAUX
تھی	had been	VAUX
اور	and	CC
بدعنوانیوں	corruptions	NN
کا	concerning	PSP
ارتکاب	perpetration	NN
کرنے	To	VM
والوں	people	PSP
کو	to	PSP
اپنے	Your	PRP
حصہ	part	NN
کی	of	PSP
رقم	number	NN
ٹھکانے	whereabouts	VM
لگانے	Apply	VAUX
یا	or	CC
کرپشن	Corruption	NN
سے	from	PSP
مربوط	linked	JJ
دستاویزات	Documents	NN
کو	to	PSP
تلف	destroy	JJ
کرنے	To	VM
کا	concerning	PSP
موقع	opportunity	NN
دینے	To	VM
تک	until	PSP
سی	C	NNP
بی	b	NNP
آئی	i	NNP
کو	to	PSP
غیرمتحرک	immobile	JJ
رکھا	kept	VM
۔	?	SYM
یہ	this	PRP
ایسا	such	PRP
واقعہ	Event	NN
ہے	Is	VM
جیسا	As	PRP
کہ	that	RP
سال	year	NN
2002	2002	NNP
میں	in	PSP
گجرات	Gujarat	NNP
میں	in	PSP
نریندر	Narendra	NNP
مودی	Modi	NNP
اور	and	CC
ان	them	PRP
کے	of	PSP
حامیوں	Supporters	NN
نے	have	PSP
انجام	Perform	NN
دیا	lamp	VM
ہے	Is	VAUX
۔	?	SYM
تاہم	However	CC
گجرات	Gujarat	NNP
کے	of	PSP
دو	two	Q
سینئر	Senior	JJ
آئی	i	NNP
پی	p	NNP
ایس	S	NNP
آفیسرس	Officers	NN
آر	r	NNP
بی	b	NNP
سری	Sri	NNP
کمار	Kumar	NNP
اور	and	CC
سنجیو	Sanjeev	NNP
آر	r	NNP
بھٹ	bhat	NNP
نے	have	PSP
نریندر	Narendra	NNP
مودی	Modi	NNP
کی	of	PSP
ذہنیت	mentality	NN
کا	concerning	PSP
بھانڈا	bhanda	NN
پھوڑ	abscess	VM
کر	do	VAUX
ان	them	PRP
کے	of	PSP
سامنے	front	NN
اےک	a	Q
چیلنج	Challenge	NN
کھڑا	erect	JJ
کر	do	VM
دیا	lamp	VAUX
ہے	Is	VAUX
۔	?	SYM
سینئر	Senior	JJ
آئی	i	NNP
پی	p	NNP
ایس	S	NNP
آفیسروں	Officers	NN
نے	have	PSP
بتایا	told	VM
کہ	that	CC
چیف	Chief	NN
منسٹر	minister	NN
گجرات	Gujarat	NNP
نے	have	PSP
فسادات	Riots	NN
کے	of	PSP
دوران	during	NN
ان	them	PDM
عہدیداروں	Officials	NN
کو	to	PSP
ہدایت	Guidance	NN
دی	the	VM
تھی	had been	VAUX
کہ	that	CC
وہ	she	PRP
ہندوؤں	Hindus	NN
کو	to	PSP
اپنا	own	PRP
غصہ	anger	NN
نکالنے	Extract	VM
کا	concerning	PSP
موقع	opportunity	NN
دیں	give	VM
اور	and	CC
مسلمانوں	Muslims	NN
کو	to	PSP
سبق	lesson	NN
سکھائیں	Teach	VM
۔	?	SYM
سنجیو	Sanjeev	NNP
بھٹ	bhat	NNP
نے	have	PSP
4	4	NNP
اپریل	April	NNP
کو	to	PSP
سپریم	Supreme	NNP
کورٹ	Court	NNP
میں	in	PSP
اپنا	own	PRP
اےک	a	Q
حلف نامہ	affidavit	NN
پیش	presented	NN
کیا	what	VM
جس	Which	PRP
میں	in	PSP
انہوں	He	PRP
نے	have	PSP
مودی	Modi	NNP
کے	of	PSP
خلاف	against	PSP
یہ	this	PDM
الزام	allegation	NN
لگایا	imposed	VM
۔	?	SYM
اس	this	PDM
حلف نامہ	affidavit	NN
میں	in	PSP
انہوں	He	PRP
نے	have	PSP
سپریم	Supreme	NNP
کورٹ	Court	NNP
کی	of	PSP
جانب	on the side	NN
سے	from	PSP
فسادات	Riots	NN
کی	of	PSP
تحقیقات	Investigation	NN
کے	of	PSP
لئے	for	PSP
مقررکردہ	Appointed	JJ
خصوصی	Special	JJ
تحقیقاتی	Investigative	JJ
ٹیم	team	NN
پر	on	PSP
بھی	also	RP
الزام	allegation	NN
عائد	imposed	JJ
کیا	what	VM
کہ	that	CC
وہ	she	PRP
پردہ پوشی	cover-up	NN
کی	of	PSP
مہم	campaign	NN
میں	in	PSP
مصروف	busy	JJ
ہے	Is	VM
۔	?	SYM
بھٹ	bhat	NNP
کے	of	PSP
مطابق	according	PSP
انہوں	He	PRP
نے	have	PSP
جو	who	PDM
الزامات	Charges	NN
عائد	imposed	JJ
کئے	made	VM
ہےں	is	VAUX
اس	this	PRP
سے	from	PSP
سابرمتی	Sabarmati	NNP
ایکسپریس	Express	NNP
کے	of	PSP
ڈبہ	box	NN
s-1	s-1	NNP
کے	of	PSP
جلنے	burn	NN
کی	of	PSP
وجہ	reason	PSP
بننے	Become	VM
والے	the ones	PSP
واقعات	Events	NN
کی	of	PSP
حقیقی	genuine	JJ
نوعیت	Type	NN
پر	on	PSP
روشنی	light	NN
ڈالی	Dali	VM
جا	Be	VAUX
سکتی	Can	VAUX
ہے	Is	VAUX
۔	?	SYM
انہوں	He	PRP
نے	have	PSP
یہ	this	PRP
بھی	also	RP
بتایا	told	VM
کہ	that	CC
ایس	S	NNP
آئی	i	NNP
ٹی	T	NNP
ان	them	PRP
کا	concerning	PSP
بیان	statement	NN
ریکارڈ	Record	NN
کرنے	To	VM
کے	of	PSP
بجائے	instead	RP
ان	them	PRP
کا	concerning	PSP
مذاق	fun	NN
اُڑانے	blow up	VM
کی	of	PSP
کوشش	attempt	NN
کر	do	VM
رہی	remained	VAUX
ہے	Is	VAUX
۔	?	SYM
انہوں	He	PRP
نے	have	PSP
پہلے	before	NN
ہی	hey	RP
ایس	S	NNP
آئی	i	NNP
ٹی	T	NNP
کو	to	PSP
تفصیلی	detailed	JJ
حقائق	Facts	NN
سے	from	PSP
واقف	Familiar	JJ
کروا	Get	VM
دیا	lamp	VAUX
تھا	was	VAUX
۔	?	SYM
لیکن	but	CC
ان	them	PRP
کے	of	PSP
بیان	statement	NN
کو	to	PSP
کوئی	any	PRP
اہمیت	importance	NN
نہیں	not	NEG
دی	the	VM
گئی	Been	VAUX
۔	?	SYM
اس	this	PRP
پر	on	PSP
گجرات	Gujarat	NNP
فساد	Violence	NN
متاثرین	Victims	NN
کی	of	PSP
لڑائی	Fighting	NN
لڑنے	Fight	VM
والی	volley	PSP
جہدکار	activist	NN
تیستا	Teesta	NNP
سیتلواڈ	Setalvad	NNP
نے	have	PSP
کہا	Said	VM
کہ	that	CC
یہ	this	PRP
پہلا	first	Q
موقع	opportunity	NN
ہے	Is	VM
کہ	that	CC
ہمیں	We	PRP
وہاں	there	PRP
موجود	Existing	JJ
کسی	A	PRP
شخص	person	NN
کی	of	PSP
راست	Direct	JJ
شہادت	martyrdom	NN
مل	Find	VM
رہی	remained	VAUX
ہے	Is	VAUX
۔	?	SYM
یہاں	here	PRP
اےک	a	Q
ایسا	such	PDM
شخص	person	NN
موجود	Existing	JJ
ہے	Is	VM
جو	who	PRP
آزادی	freedom	NN
کے	of	PSP
بعد	After	NN
کی	of	PSP
تاریخ	history	NN
کے	of	PSP
بدترین	Worst	JJ
قتل	killing	NN
عام	common	JJ
کے	of	PSP
بعد	After	NN
دو	two	Q
مرتبہ	degree	NN
چیف	Chief	NN
منسٹر	minister	NN
منتخب	chosen	JJ
ہوا	air	VM
جس	Which	PRP
نے	have	PSP
یقیناً	Surely	RB
تحقیقات	Investigation	NN
کو	to	PSP
متاثر	affected	JJ
کرنے	To	VM
کے	of	PSP
لیے	To	PSP
اپنے	Your	PRP
سیاسی	political	JJ
اثر	effect	NN
و	and	RP
رسوخ	influence	NN
کا	concerning	PSP
استعمال	use	NN
کیا	what	VM
ہے	Is	VAUX
۔	?	SYM
میں	in	PRP
یہ	this	PRP
کہنا	say	VM
چاہتی	Want	VAUX
ہوں	I	VAUX
کہ	that	CC
اس	this	PDM
حقیقت	truth	NN
کے	of	PSP
بعد	After	NN
سری	Sri	NNP
کمار	Kumar	NNP
اور	and	CC
سنجے	Sanjay	NNP
بھٹ	bhat	NNP
کو	to	PSP
آئندہ	Future	JJ
سال	year	NN
پدما	Padma	NNP
ایوارڈ	Award	NNP
کے	of	PSP
لئے	for	PSP
منتخب	chosen	JJ
کیا	what	VM
جانا	go	VAUX
چاہیے	Must	VAUX
کیونکہ	because	CC
وہ	she	PRP
اس	this	PRP
کے	of	PSP
حقدار	Entitled	NN
ہیں	Are	VM
۔	?	SYM
آج	today	NN
کے	of	PSP
رشوت	bribe	NN
ستانی	strife	NN
کے	of	PSP
دور	far	NN
میں	in	PSP
اس	this	PDM
طرح	like	NN
کے	of	PSP
آفیسرس	Officers	NN
بہت	very	JJ
ہی	hey	RP
کم	less	JJ
ملیں	Find	VBF
۔	?	SYM
میں	in	PRP
نے	have	PSP
گزشتہ	Last	NN
کے	of	PSP
کالم	column	NN
میں	in	PSP
اس	this	PDM
بات	talk	NN
کا	concerning	PSP
اظہار	declaration	NN
کیا	what	VM
تھا	was	VAUX
کہ	that	CC
فرقہ	sect	JJ
وارانہ	plimatic	NN
فسادات	Riots	NN
کا	concerning	PSP
زہر	poison	NN
پھیلانے	Spread	VM
کی	of	PSP
تحقیقات	Investigation	NN
کے	of	PSP
لئے	for	PSP
اےک	a	Q
اعلیٰ	High	JJ
اختیاری	optional	JJ
کمیٹی	committee	NN
قائم	established	JJ
کی	of	VM
جائے	Be	VAUX
اور	and	CC
اس	this	PDM
کمیٹی	committee	NN
میں	in	PSP
ایسے	such	PRP
دو	two	Q
پولیس	police	NN
عہدیداروں	Officials	NN
کی	of	PSP
قابلیت	Qualifications	NN
کے	of	PSP
مماثل	Corresponding	PSP
ہونا	be	VM
چاہیے	Must	VAUX
جنہوں	who	PRP
نے	have	PSP
بڑی	Large	JJ
دلیری	boldness	NN
سے	from	PSP
حقائق	Facts	NN
کا	concerning	PSP
انکشاف	discovery	NN
کیا	what	VM
ہے	Is	VAUX
۔	?	SYM
اگر	what if	CC
ایسے	such	PDM
عہدیدار	Official	NN
اس	this	PDM
کمیٹی	committee	NN
میں	in	PSP
شامل	included	JJ
ہوں	I	VM
تو	thou	CC
کئی	several	Q
بڑے	Large	JJ
رتبہ	status	NN
رکھنے	Keep	VM
والے	the ones	PSP
افراد	People	NN
سلاخوں	Bars	NN
کے	of	PSP
پیچھے	behind	NN
زندگی	life	NN
گزارنے	pass by	VM
پر	on	PSP
مجبور	compelled	JJ
ہو	be	VM
جائیں	go	AUXT
۔	?	SYM
سال	year	NN
2002	2002	NNP
کے	of	PSP
گجرات	Gujarat	NNP
فسادات	Riots	NN
نے	have	PSP
ساری	All	Q
دنیا	world	NN
میں	in	PSP
ہندوستان	India	NNP
کا	concerning	PSP
سر	head	NN
شرم	shame	NN
سے	from	PSP
جھکا	bent	VM
دیا	lamp	VAUX
ہے	Is	VAUX
۔	?	SYM
مخالف	opposite	JJ
مسلم	muslim	NNP
فسادات	Riots	NN
پر	on	PSP
ہی	hey	RP
مودی	Modi	NNP
نے	have	PSP
اکتفا	aktifa	NN
نہیں	not	NEG
کیا	what	VM
بلکہ	but	CC
سہراب	Sohrab	NNP
الدین	al-Din	NNP
اور	and	CC
عشرت	Ishrat	NNP
جہاں	Jahan	NNP
جیسے	Like	PSP
بےقصور	innocent	JJ
افراد	People	NN
کو	to	PSP
بھی	also	RP
دہشت گرد	terrorist	NN
کا	concerning	PSP
لیبل	label	NN
لگا	felt	VM
کر	do	VAUX
فرضی	assumed	JJ
انکاؤنٹر	encounter	NN
میں	in	PSP
ہلاک	Killed	JJ
کر	do	VM
دیا	lamp	VAUX
گیا	Was	VAUX
۔	?	SYM
ان	them	PDM
دونوں	both	Q
مقدمات	Cases	NN
میں	in	PSP
عدالتوں	Courts	NN
نے	have	PSP
گجرات	Gujarat	NNP
حکومت	government	NN
کے	of	PSP
خلاف	against	PSP
شکنجہ	shackle	NN
کس	What	JJ
دیا	lamp	VM
ہے	Is	VAUX
۔	?	SYM
اب	now	PRP
وقت	time	NN
آ	Come	VM
گیا	Was	VAUX
ہے	Is	VAUX
کہ	that	CC
ایسے	such	PDM
افراد	People	NN
کو	to	PSP
سلاخوں	Bars	NN
کے	of	PSP
پیچھے	behind	NN
ڈھکیلا	covered	VM
جائے	Be	VAUX
۔	?	SYM
اس	this	PRP
کے	of	PSP
ساتھ	together	NN
ساتھ	together	NN
دولت	riches	NNP
مشترکہ	joint	NNP
کھیلوں	Sports	NN
میں	in	PSP
رقم	number	NN
کے	of	PSP
غبن	embezzlement	NN
کے	of	PSP
الزامات	Charges	NN
کا	concerning	PSP
سامنا	confrontation	NN
کر	do	VM
رہے	remain	VAUX
سریش	Suresh	NNP
کلماڈی	Kalmadi	NNP
کے	of	PSP
خلاف	against	PSP
بھی	also	RP
سخت	hard	JJ
کارروائی	Action	NN
کی	of	VM
جائے	Be	VAUX
۔	?	SYM
اس	this	PRP
سے	from	PSP
دوسروں	Others	NN
کو	to	PSP
سبق	lesson	NN
حاصل	gain	NN
ہوگا	Will	VM
اور	and	CC
مستقبل	future	NN
میں	in	PSP
اس	this	PDM
طرح	like	NN
کے	of	PSP
واقعات	Events	NN
کا	concerning	PSP
انسداد	Counter	NN
کیا	what	VM
جا	Be	VAUX
سکتا	Can	VAUX
ہے	Is	VAUX
۔	?	SYM
بصورت	otherwise	PSP
دیگر	other	JJ
ملک	country	NN
میں	in	PSP
رشوت خوری	bribery	NN
اور	and	CC
فرقہ	sect	NN
واریت	ism	NN
زہر	poison	NN
کی	of	PSP
طرح	like	PSP
پھیل	Spread	VM
کر	do	VAUX
سارے	All	Q
ملک	country	NN
کو	to	PSP
کھوکھلا	hollow	JJ
بنا	Create	VM
دےگی	will give	VAUX
۔	?	SYM
ڈی	De	NNP
ایم	M.	NNP
کے	K	NNP
نے	have	PSP
آج	today	NN
مرکز	center	NN
میں	in	PSP
یو	U	NNP
پی	p	NNP
اے	O	NNP
اتحاد	alliance	NN
سے	from	PSP
علاحدگی	secession	NN
اختیار	option	NN
نہ	not	NEG
کرنے	To	VM
کا	concerning	PSP
فیصلہ	decision	NN
کیا	what	VM
تاہم	However	CC
2G	2G	NNP
اسپیکٹرم	spectrum	NNP
معاملے	Case	NN
میں	in	PSP
قانونی	legal	JJ
لڑائی	Fighting	NN
جاری	Continue	JJ
رکھی	kept	VM
جائیگی	will go	VAUX
۔	?	SYM
انھوں	They	PRP
نے	have	PSP
کہا	Said	VM
کہ	that	CC
پارٹی	party	NN
اس	this	PDM
مسئلے	Problem	NN
پر	on	PSP
قانونی	legal	JJ
لڑائی	Fighting	NN
جاری	Continue	JJ
رکھتے	keep	VM
ہوئے	became	VAUX
یہ	this	PRP
ثابت	established	JJ
کرےگی	will do	VM
کہ	that	CC
ان	them	PRP
کی	of	PSP
دختر	daughter	NN
اور	and	CC
پارٹی	party	NN
بےقصور	innocent	JJ
ہے	Is	VM
۔	?	SYM
انھوں	They	PRP
نے	have	PSP
کہا	Said	VM
کہ	that	CC
ہم	we	PRP
عدالت	court	NN
میں	in	PSP
یہ	this	PRP
ثابت	established	JJ
کر	do	VM
دکھائیں	display	VBF
۔	?	SYM
کروناندھی	Karunanidhi	NNP
نے	have	PSP
اخباری	journalistic	JJ
نمائندوں	Representatives	NN
سے	from	PSP
بات چیت	conversation	NN
کرتے	do	VM
ہوئے	became	VAUX
بتایا	told	VM
کہ	that	CC
سچائی	truth	NN
کو	to	PSP
ثابت	established	JJ
کرنے	To	VM
کے	of	PSP
لئے	for	PSP
ہم	we	PRP
قانونی	legal	JJ
راہ	path	NN
اختیار	option	NN
کریں	do	VBF
۔	?	SYM
جب	when	PRP
اُن	them	NN
سے	from	PSP
پوچھا	Asked	VM
گیا	Was	VAUX
کہ	that	CC
کیا	what	PRP
کنی	kuni	NNP
موزھی	mozhi	NNP
6	6	NNP
مئی	May	NNP
کو	to	PSP
دہلی	Delhi	NNP
میں	in	PSP
سی	C	NNP
بی	b	NNP
آئی	i	NNP
عدالت	court	NN
کے	of	PSP
روبرو	face-to-face	NN
پیش	presented	NN
ہوں	I	VBF
کیوںکہ	because	CC
اُنھیں	Them	PRP
سمن	summons	NN
جاری	Continue	JJ
کیا	what	VM
گیا	Was	VAUX
ہے	Is	VAUX
۔	?	SYM
کروناندھی	Karunanidhi	NNP
نے	have	PSP
اثبات	ascertainment	NN
میں	in	PSP
جواب	answer	NN
دیا	lamp	VM
۔	?	SYM
انھوں	They	PRP
نے	have	PSP
کہا	Said	VM
کہ	that	CC
کنی	kuni	NNP
موزھی	mozhi	NNP
PUNCT	PUNCT	punct
جیہ	jeh	NNP
للیتا	Lalita	NNP
نہیں	not	NEG
ہے	Is	VM
جو	who	PRP
عدالت	court	NN
کا	concerning	PSP
سمن	summons	NN
نظرانداز	Ignore	JJ
کرے	do	VM
۔	?	SYM
اُن	them	PRP
کا	concerning	PSP
اشارہ	gesture	NN
انا	Anna	NNP
ڈی	De	NNP
ایم	M.	NNP
کے	of	NNP
سربراہ	Chief	NN
جیہ	jeh	NNP
للیتا	Lalita	NNP
کی	of	PSP
جانب	on the side	NN
سے	from	PSP
غیرمحسوب	unaccounted	JJ
اثاثہ جات	Assets	NN
مقدمہ	preamble	NN
میں	in	PSP
شخصی	Personal	JJ
حاضری	attendance	NN
سے	from	PSP
استثنی	Exceptions	NN
کے	of	PSP
لئے	for	PSP
دو	two	Q
مرتبہ	degree	NN
دی	the	VM
گئی	Been	VAUX
درخواست	Request	NN
کی	of	PSP
طرف	side	NN
تھا	was	VM
۔	?	SYM
جیہ	jeh	NNP
للیتا	Lalita	NNP
کے	of	PSP
خلاف	against	PSP
یہ	this	PDM
مقدمہ	preamble	NN
بنگلور	bangalore	NNP
کی	of	PSP
عدالت	court	NN
میں	in	PSP
جاری	Continue	JJ
ہے	Is	VM
۔	?	SYM
اےک	a	Q
اور	and	JJ
سوال	question	NN
کے	of	PSP
جواب	answer	NN
میں	in	PSP
انھوں	They	PRP
نے	have	PSP
کہا	Said	VM
کہ	that	CC
اس	this	PDM
مسئلے	Problem	NN
پر	on	PSP
پارٹی	party	NN
کو	to	PSP
پشیمانی	remorse	NN
کا	concerning	PSP
سامنا	confrontation	NN
بالکل	absolutely	RB
نہیں	not	NEG
ہے	Is	VM
۔	?	SYM
اجلاس	Meeting	NN
میں	in	PSP
قرارداد	Resolution	NN
منظور	approved	JJ
کرتے	do	VM
ہوئے	became	VAUX
بعض	Some	Q
جماعتوں	Parties	NN
پر	on	PSP
یو	U	NNP
پی	p	NNP
اے	O	NNP
حلیفوں	allies	NN
کے	of	PSP
مابین	Between	NN
اعتماد	trust	NN
کو	to	PSP
نقصان	damage	NN
پہنچانے	deliver	VM
کی	of	PSP
کوشش	attempt	NN
کا	concerning	PSP
الزام	allegation	NN
عائد	imposed	JJ
کیا	what	VM
گیا	Was	VAUX
اور	and	CC
کہا	Said	VM
گیا	Was	VAUX
کہ	that	CC
اس	this	PRP
کا	concerning	PSP
مقصد	goal	NN
اتحاد	alliance	NN
کو	to	PSP
ختم	finished	JJ
کرنا	do	VM
ہے	Is	VAUX
۔	?	SYM
قرارداد	Resolution	NN
کے	of	PSP
مطابق	according	PSP
2G	2G	NNP
اسپیکٹرم	spectrum	NNP
مقدمے	Trial	NN
کے	of	PSP
ذریعہ	By	PSP
ڈی	De	NNP
ایم	M.	NNP
کے	of	NNP
کی	of	PSP
ساکھ	credibility	NN
کو	to	PSP
نقصان	damage	NN
پہنچانے	deliver	VM
کی	of	PSP
کوشش	attempt	NN
کی	of	VM
جا	Be	VAUX
رہی	remained	VAUX
ہے	Is	VAUX
اور	and	CC
وہ	she	PRP
قانونی	legal	JJ
ذرائع	Sources	NN
اختیار	option	NN
کریگی	To	VM
۔	?	SYM
سی	C	NNP
بی	b	NNP
آئی	i	NNP
کی	of	PSP
اضافی	additional	JJ
چارج	Charge	NN
شیٹ	Sheet	NN
میں	in	PSP
کنی	kuni	NNP
موزھی	mozhi	NNP
کا	concerning	PSP
نام	name	NN
شامل	included	NN
کئے	made	VM
جانے	Go	VAUX
پر	on	PSP
بھی	also	RP
حیرت	surprise	NN
و	and	RP
تعجب	Wonder	NN
کا	concerning	PSP
اظہار	declaration	NN
کیا	what	VM
گیا	Was	VAUX
۔	?	SYM
2G	2G	NNP
اسپیکٹرم	spectrum	NNP
مسئلے	Problem	NN
پر	on	PSP
کانگریس	Congress	NNP
اور	and	CC
ڈی	De	NNP
ایم	M.	NNP
کے	of	NNP
کے	of	PSP
مابین	Between	NN
روابط	Contacts	NN
پہلے	before	NN
ہی	hey	RP
سے	from	PSP
کشیدہ	tense	JJ
ہےں	is	VM
۔	?	SYM
پرکٹ	Percut	NNP
میں	in	PSP
مسلم	muslim	NNP
کمیونٹی	Community	NN
ہال	Hall	NN
(	(	SYM
شادی خانہ	marriage box	NN
)	)	SYM
کی	of	PSP
تعمیر	construction	NN
کے	of	PSP
لئے	for	PSP
رکن	member	NN
پارلیمنٹ	Parliament	NN
مسٹر	Mr	RP
مدھوگوڑ	Madhugod	NNP
یشکی	Yashki	NNP
اپنے	Your	PRP
ترقیاتی	Development	JJ
فنڈ	Fund	NN
سے	from	PSP
پانچ	five	Q
لاکھ	lac	Q
رقم	number	NN
منظور	approved	JJ
کی	of	VM
ہے	Is	VAUX
۔	?	SYM
ایم	M.	NNP
پی	p	NNP
ٹی	T	NNP
سی	C	NNP
ایم	M.	NNP
اے	O	NNP
نعیم	Nayeem	NNP
نے	have	PSP
اس	this	PDM
رقمی	Digital	JJ
منظوری	approval	NN
پر	on	PSP
مسٹر	Mr	RP
مدھو	Madhu	NNP
گوڑ	gaur	NNP
یشکی	Yashki	NNP
سے	from	PSP
اظہار	declaration	NN
تشکر	thanks	NN
کیا	what	VM
ہے	Is	VAUX
۔	?	SYM
واضح	clear	JJ
رہے	remain	VM
کہ	that	CC
جناب	sir	RP
کے	K	NNP
ایم	M.	NNP
خان	khan	NNP
مرحوم	Late	JJ
رکن	member	NN
راجیہ	rajya	NNP
سبھا	sabha	NNP
نے	have	PSP
اس	this	PRP
کی	of	PSP
تعمیر	construction	NN
کے	of	PSP
لئے	for	PSP
ابتدائی	initial	JJ
رقم	number	NN
منظور	approved	JJ
کی	of	VM
تھی	had been	VAUX
۔	?	SYM
جوگی	Jogi	NNP
پیٹ	pet	NNP
سے	from	PSP
دو	two	Q
کیلومیٹر	km	NN
فاصلہ	distance	NN
پر	on	PSP
ناندیڑ	Nanded	NNP
جانے	Go	VM
والی	volley	PSP
روڈ	Road	NN
پر	on	PSP
اناساگر	Anasgar	NNP
گاؤں	village	NN
کے	of	PSP
پاس	nearby	NN
بس	bus	NN
نے	have	PSP
آٹو	Auto	NN
کو	to	PSP
ٹکر	hit	NN
دے	Give	VM
دی	the	VAUX
۔	?	SYM
مہاراشٹرا	Maharashtra	NNP
ڈپو	Depot	NN
کی	of	PSP
بس	bus	NN
جوگی	Jogi	NNP
پیٹ	pet	NNP
سے	from	PSP
ہنگولی	Hingoli	NNP
جا	Be	VM
رہی	remained	VAUX
تھی	had been	VAUX
جبکہ	While	CC
اناساگر	Anasgar	NNP
گاؤں	village	NN
کے	of	PSP
پاس	nearby	NN
مخالف	opposite	JJ
سمت	direction	NN
سے	from	PSP
اےک	a	Q
آٹو	Auto	NN
پداپور	Padapur	NNP
سے	from	PSP
جوگی	Jogi	NNP
پیٹ	pet	NNP
آ	Come	VM
رہی	remained	VAUX
تھی	had been	VAUX
۔	?	SYM
شیوراج	Shivraj	NNP
کو	to	PSP
معمولی	normal	JJ
زخم	sore	NN
آئے	Come	VM
۔	?	SYM
شکیل	Shakil	NNP
اور	and	CC
پروین	Parveen	NNP
بیگم	begum	NNP
کی	of	PSP
حالت	condition	NN
تشویشناک	worrisome	JJ
ہے	Is	VM
۔	?	SYM
ڈاکٹروں	Doctors	NN
نے	have	PSP
انہیں	Them	PRP
حیدرآباد	Hyderabad	NNP
جانے	Go	VM
کا	concerning	PSP
مشورہ	advice	NN
دیا	lamp	VM
۔	?	SYM
چنانچہ	So	CC
دونوں	both	NN
کو	to	PSP
حیدرآباد	Hyderabad	NNP
روانہ	depart	JJ
کیا	what	VM
گیا	Was	VAUX
۔	?	SYM
باقی	remainder	JJ
زخمیوں	injured	NN
کو	to	PSP
سنگاریڈی	Sangareddy	NNP
اور	and	CC
جوگی	Jogi	NNP
پیٹ	pet	NNP
سرکاری	Official	JJ
دواخانہ	pharmacy	NN
میں	in	PSP
علاج	cure	NN
جاری	Continue	JJ
ہے	Is	VM
۔	?	SYM
پولیس	police	NN
بس	bus	NN
ڈرائیور	driver	NN
کو	to	PSP
حراست	custody	NN
میں	in	PSP
لے	Take	VM
لیا	took	VAUX
اور	and	CC
پوچھ	Asking	NN
تاچھ	inquiry	NN
شروع	beginning	NN
کر	do	VM
دی	the	VAUX
ہے	Is	VAUX
۔	?	SYM
بس	bus	NN
میں	in	PSP
سوار	ride	JJ
سارے	All	Q
مسافر	passenger	NN
محفوظ	safe	JJ
ہےں	is	VM
۔	?	SYM
سخت	hard	JJ
ناموافق	unfavorable	JJ
حالات	circumstance	NN
کے	of	PSP
باوجود	despite	PSP
اردو	Urdu	NNP
صرف	only	RP
اپنے	Your	PRP
بل بوتے	on the	NN
پر	on	PSP
آج	today	NN
بھی	also	RP
زندہ	alive	JJ
اور	and	CC
جاندار	living	JJ
ہے	Is	VM
۔	?	SYM
کسی	A	PRP
شاعر	poet	NN
نے	have	PSP
مشاعروں	Mushairas	NN
کے	of	PSP
تعلق	relationship	PSP
سے	from	PSP
اپنے	Your	PRP
احساسات	Feelings	NN
کو	to	PSP
ان	them	PDM
الفاظ	words	NN
میں	in	PSP
قلم بند	pen closed	JJ
کیا	what	VM
کہ	that	CC
مشاعرہ	mushaira	NN
اےک	a	Q
تہذیبی	Cultural	JJ
ادارہ	institute	NN
ہے	Is	VM
جو	who	PRP
صدیوں	Centuries	NN
سے	from	PSP
قائم	established	JJ
ہے	Is	VM
۔	?	SYM
مشاعرے	mushaira	NN
کی	of	PSP
روایت	tradition	NN
سے	from	PSP
شاعری	poetry	NN
کی	of	PSP
روایت	tradition	NN
کو	to	PSP
جدا	separate	JJ
نہیں	not	NEG
کیا	what	VM
جا	Be	VAUX
سکتا	Can	VAUX
PUNCT	PUNCT	punct
یہی	This	PDM
سبب	cause	NN
ہے	Is	VM
کہ	that	CC
مشاعرے	mushaira	NN
میں	in	PSP
ادب	literature	NN
ذوق	Taste	NN
حضرات	gentlemen	NN
کا	concerning	PSP
ہجوم	the crowd	NN
امڈ	Umd	VM
آتا	come	VAUX
ہے	Is	VAUX
۔	?	SYM
بزم	bazm	NN
گلشن	Gulshan	NN
ادب	literature	NN
کا	concerning	PSP
مشاعرہ	mushaira	NN
عمر	age	NNP
گلشن	Gulshan	NNP
چندرائن	Chandrayaan	NNP
گٹہ	gutta	NNP
میں	in	PSP
30	30	NNP
اپریل	April	NNP
یعنی	i.e.	RP
کل	tomorrow	NN
شام	Syria	NN
منعقد	Held	JJ
ہونے	be	VM
جا	Be	VAUX
رہا	remained	VAUX
ہے	Is	VAUX
۔	?	SYM
جس	Which	PRP
کی	of	PSP
تیاریاں	Preparations	NN
مکمل	complete	JJ
ہو	be	VM
گئیں	Were	VAUX
۔	?	SYM
پٹلم	patalam	NNP
اور	and	CC
نظام	Nizam	NNP
ساگر	Sagar	NNP
کے	of	PSP
قومی	national	JJ
شاہراہوں	Highways	NN
پر	on	PSP
آر	r	NNP
ٹی	T	NNP
او	almost	NNP
مسٹر	Mr	RP
آر	r	NNP
پنڈری	Pindri	NNP
نے	have	PSP
بڑی	bari	NNP
کوڑبگل	Kodbagal	NNP
کے	of	PSP
جملہ	sentence	JJ
پانچ	five	Q
جیپوں	Jeeps	NN
کو	to	PSP
پولیس	police	NN
تحویل	Custody	NN
میں	in	PSP
لیتے	Take	VM
ہوئے	became	VAUX
علحدہ	separate	JJ
علحدہ	separate	NN
کیس	case	NN
رجسٹر	Register	NN
کر	do	VM
کے	of	VAUX
انہیں	Them	PRP
نوٹسیں	Notes	NN
جاری	Continue	JJ
کر	do	VM
دی	the	VAUX
۔	?	SYM
پٹلم	patalam	NNP
وی	V	NNP
آر	r	NNP
او	almost	NNP
مسٹر	Mr	RP
نارائن	Narayan	NNP
راؤ	Rao	NNP
کو	to	PSP
طلب	demand	NN
کر	do	VM
کے	of	VAUX
جیپوں	Jeeps	NN
سے	from	PSP
گیاس	gas	NN
کا	concerning	PSP
تیل	oil	NN
ڈبوں	boxes	NN
سے	from	PSP
نکال	take out	VM
کر	do	VAUX
پٹلم	patalam	NNP
تحصیلدار	Tahsildar	NN
مسٹر	Mr	RP
این	En	NNP
اشوک	Ashok	NNP
کے	of	PSP
روبرو	face-to-face	NN
پیش	presented	NN
کیا	what	VM
۔	?	SYM
انہوں	He	PRP
نے	have	PSP
ضلع	District	NN
نظام آباد	Nizamabad	NNP
کلکٹر	Collector	NN
آفس	office	NN
معائنہ	inspection	NN
کے	of	PSP
لئے	for	PSP
روانہ	depart	JJ
کر	do	VM
دیا	lamp	VAUX
۔	?	SYM
آر	r	NNP
ٹی	T	NNP
او	almost	NNP
مسٹر	Mr	RP
آر	r	NNP
پنڈری	Pindri	NNP
اردو	Urdu	NNP
اور	and	CC
تلگو	Telugu	NNP
نمائندوں	Representatives	NN
سے	from	PSP
بات چیت	conversation	NN
کرتے	do	VM
ہوئے	became	VAUX
کہا	Said	VM
کہ	that	CC
خانگی	private	JJ
گاڑیوں	Cars	NN
میں	in	PSP
ڈیزل	Diesel	NN
کے	of	PSP
بجائے	instead	RP
گیاس	gas	NN
کا	concerning	PSP
تیل	oil	NN
استعمال	use	NN
کرنے	To	VM
سے	from	PSP
راہ گیروں	passers-by	NN
کو	to	PSP
بےشمار	innumerable	JJ
بیماریوں	Diseases	NN
کا	concerning	PSP
سامنا	confrontation	NN
کرنا	do	VM
پڑ	fall	VAUX
رہا	remained	VAUX
ہے	Is	VAUX
۔	?	SYM
اگر	what if	CC
کاغذات	Papers	NN
مکمل	complete	JJ
نہیں	not	NEG
رہیں	Be	VM
تو	thou	CC
قانونی	legal	JJ
کارروائی	Action	NN
کی	of	VM
جائےگی	will go	VAUX
۔	?	SYM
کلکٹر	Collector	NN
ضلع	District	NN
میدک	Medak	NNP
مسٹر	Mr	RP
سریش	Suresh	NNP
کمار	Kumar	NNP
نے	have	PSP
کہا	Said	VM
کہ	that	CC
موسم	season	NN
گرما	summer	NN
میں	in	PSP
پینے	Drink	NN
کے	of	PSP
پانی	water	NN
کی	of	PSP
قلت	shortage	NN
سے	from	PSP
نمٹنے	Deal	VM
کی	of	PSP
غرض	purpose	PSP
سے	from	PSP
ریاستی	State	JJ
حکومت	government	NN
نے	have	PSP
ضلع	District	NN
میدک	Medak	NNP
کے	of	PSP
لئے	for	PSP
17.26	17.26	Q
کروڑ	Million	Q
روپئے	Rs.	NN
رقم	number	NN
کی	of	PSP
منظوری	approval	NN
دی	the	VM
ہے	Is	VAUX
۔	?	SYM
کلکٹر	Collector	NN
ضلع	District	NN
میدک	Medak	NNP
مسٹر	Mr	RP
سریش	Suresh	NNP
کمار	Kumar	NNP
کل	tomorrow	NN
احاطہ	bawn	NN
منڈل	Mandal	NN
پرجا	paraja	NNP
پریشد	preshad	NNP
نارائن	Narayan	NNP
کھیڑ	khed	NNP
میں	in	PSP
منعقدہ	held	JJ
پینے	Drink	NN
کے	of	PSP
پانی	water	NN
PUNCT	PUNCT	punct
صاف	clear	JJ
صفائی	Cleaning	NN
اور	and	CC
حفظان	Hygiene	NN
صحت	health	NN
سے	from	PSP
متعلق	About	PSP
حلقہ	circle	NN
اسمبلی	Assembly	NN
نارائن	Narayan	NNP
کھیڑ	khed	NNP
کے	of	PSP
سرکاری	Official	JJ
عہدیداروں	Officials	NN
اور	and	CC
سیاسی	political	JJ
قائدین	Leaders	NN
کے	of	PSP
شعور	consciousness	NN
بیداری	Awareness	NN
پروگرام	program	NN
کو	to	PSP
مخاطب	address	JJ
کر	do	VM
رہے	remain	VAUX
تھے	were	VAUX
۔	?	SYM
انہوں	He	PRP
نے	have	PSP
بتایا	told	VM
کہ	that	CC
حلقہ	circle	NN
اسمبلی	Assembly	NN
نارائن	Narayan	NNP
کھیڑ	khed	NNP
میں	in	PSP
پینے	Drink	NN
کے	of	PSP
پانی	water	NN
کی	of	PSP
شدید	acute	JJ
قلت	shortage	NN
ہے	Is	VM
اور	and	CC
قلت	shortage	NN
آب	water	NN
جیسے	Like	PDM
سنگین	bayonet	JJ
مسئلہ	problem	NN
کے	of	PSP
حل	solution	NN
کی	of	PSP
غرض	purpose	PSP
سے	from	PSP
زائد	More	JJ
فنڈس	Funds	NN
مختص	allocation	JJ
کئے	made	VM
جا	Be	VAUX
رہے	remain	VAUX
ہےں	is	VAUX
۔	?	SYM
ضلع	District	NN
کلکٹر	Collector	NN
نے	have	PSP
بتایا	told	VM
کہ	that	CC
سی	C	NNP
آر	r	NNP
آیف	Aif	NNP
اسکیم	Scheme	NN
کے	of	PSP
تحت	Under	PSP
ضلع	District	NN
میدک	Medak	NNP
کو	to	PSP
جملہ	sentence	NN
4.5	4.5	Q
کروڑ	Million	Q
روپئے	Rs.	NN
کی	of	PSP
منظوری	approval	NN
حاصل	gain	NN
ہوئی	happened	VM
ہے	Is	VAUX
جن	genie	PRP
کے	of	PSP
منجملہ	including	PSP
حلقہ	circle	NN
اسمبلی	Assembly	NN
نارائن	Narayan	NNP
کھیڑ	khed	NNP
کو	to	PSP
1.6	1.6	Q
کروڑ	Million	Q
روپئے	Rs.	NN
مختص	allocation	JJ
کئے	made	VM
گئے	went	VAUX
ہےں	is	VAUX
جبکہ	While	CC
این	En	NNP
آر	r	NNP
ڈی	De	NNP
ڈبلیو	W.	NNP
پی	p	NNP
اسکیم	Scheme	NN
کے	of	PSP
تحت	Under	PSP
ضلع	District	NN
میدک	Medak	NNP
کو	to	PSP
5.5	5.5	Q
کروڑ	Million	Q
روپئے	Rs.	NN
کی	of	PSP
منظوری	approval	NN
حاصل	gain	NN
ہوئی	happened	VM
ہے	Is	VAUX
جن	genie	PRP
کے	of	PSP
منجملہ	including	PSP
اسمبلی	Assembly	NN
نارائن	Narayan	NNP
کھیڑ	khed	NNP
کے	of	PSP
لئے	for	PSP
73	73	Q
لاکھ	lac	Q
روپئے	Rs.	NN
کی	of	PSP
اجرائی	release	NN
عمل	action	NN
میں	in	PSP
آئی	i	VM
ہے	Is	VAUX
۔	?	SYM
کلکٹر	Collector	NN
ضلع	District	NN
میدک	Medak	NNP
نے	have	PSP
مزید	further	RB
بتایا	told	VM
کہ	that	CC
13	13	Q
ویں	th	RP
فینانس	finance	NN
اسکیم	Scheme	NN
کے	of	PSP
تحت	Under	PSP
ضلع	District	NN
میدک	Medak	NNP
کو	to	PSP
7.26	7.26	Q
کروڑ	Million	Q
روپیوں	rupees	NN
کی	of	PSP
منظوری	approval	NN
حاصل	gain	NN
ہوئی	happened	VM
ہے	Is	VAUX
جن	genie	PRP
کے	of	PSP
منجملہ	including	PSP
حلقہ	circle	NN
اسمبلی	Assembly	NN
نارائن	Narayan	NNP
کھیڑ	khed	NNP
کو	to	PSP
78.72	78. 72	Q
لاکھ	lac	Q
روپیئے	rupay	NN
کی	of	PSP
منظوری	approval	NN
دی	the	VM
گئی	Been	VAUX
ہے	Is	VAUX
۔	?	SYM
کلکٹر	Collector	NN
نے	have	PSP
کہا	Said	VM
کہ	that	CC
قلت	shortage	NN
آب	water	NN
جیسے	Like	PSP
سنگین	bayonet	JJ
مسئلہ	problem	NN
سے	from	PSP
نمٹنے	Deal	VM
کے	of	PSP
لئے	for	PSP
فنڈس	Funds	NN
کی	of	PSP
کوئی	any	PRP
کمی	lack	NN
نہیں	not	NEG
ہے	Is	VM
۔	?	SYM
کلکٹر	Collector	NN
مسٹر	Mr	RP
سریش	Suresh	NNP
کمار	Kumar	NNP
نے	have	PSP
کہا	Said	VM
کہ	that	CC
مواضعات	villages	NN
میں	in	PSP
صاف	clear	NN
صفائی	Cleaning	NN
پر	on	PSP
خصوصی	Special	JJ
توجہ	attention	NN
دی	the	VM
جائے	Be	VAUX
تاکہ	So	CC
حفظان	Hygiene	NN
صحت	health	NN
کو	to	PSP
بہتر	better	JJ
بنایا	Made	VM
جائے	Be	VAUX
۔	?	SYM
کلکٹر	Collector	NN
ضلع	District	NN
میدک	Medak	NNP
نے	have	PSP
ٹرانسکو	Transco	NN
عہدیداروں	Officials	NN
سے	from	PSP
خواہش	desire	NN
کی	of	VM
کہ	that	CC
وہ	she	PRP
چیف	Chief	NN
منسٹر	minister	NN
کی	of	PSP
ہدایت	Guidance	NN
کے	of	PSP
مطابق	according	PSP
کسانوں	Farmers	NN
کو	to	PSP
زرعی	agricultural	JJ
اغراض	purpose	NN
کے	of	PSP
لئے	for	PSP
برقی	Electrical	NN
کی	of	PSP
موثر	Effective	JJ
سربراہی	headed	NN
کریں	do	VM
۔	?	SYM
انہوں	He	PRP
نے	have	PSP
بتایا	told	VM
کہ	that	CC
31	31	NNP
مارچ	March	NNP
تک	until	PSP
گرام	gram	NN
پنچایتوں	Panchayats	NN
کے	of	PSP
ذریعہ	By	PSP
ضلع	District	NN
میدک	Medak	NNP
میں	in	PSP
جملہ	sentence	NN
10	10	Q
کروڑ	Million	Q
روپئے	Rs.	NN
امکنہ	amkana	JJ
ٹیکس	tax	NN
وصول	Receive	JJ
ہوئے	became	VM
ہےں	is	VAUX
۔	?	SYM
میونسپل	Municipal	NN
کنٹراکٹ	contract	NN
لیبر	Labour	NN
شہر	city	NN
میں	in	PSP
باقاعدہ	regular	JJ
صفائی	Cleaning	NN
کو	to	PSP
یقینی	sure	NN
بنانے	Create	VM
کے	of	PSP
ذمہ دار	responsible	JJ
ہےں	is	VM
۔	?	SYM
فرائض	duties	NN
میں	in	PSP
کوتاہی	lapse	NN
پر	on	PSP
ان	them	PRP
[truncated: 12,605 more rows]
