# Supplementary material for: A conditional random field based approach for high-accuracy part-of-speech tagging using language-independent features
Source: PeerJ Comput Sci. 2024 Dec 11;10:e2577. doi: 10.7717/peerj-cs.2577 (PMC11784857; doi:10.7717/peerj-cs.2577)
Supplement: Supplemental Information 5 [file peerj-cs-10-2577-s005.xlsx]

## Sheet: MM-POST dataset
Word	English Translation	POS Tag
’	’	PU
دل	heart	NN
دل	heart	NN
پاکستان	Pakistan	NNP
‘	‘	PU
:	:	PU
پاکستان	Pakistan	NNP
کا	concerning	PSP
وہ	she	PRP
ملی	national	JJ
نغمہ	song	NN
جو	that	PRR
’	’	PU
دل	heart	NN
کی	of	PSP
بات	talk	NN
تھی	had been	VBF
اور	and	CC
دلوں	Hearts	NN
میں	In	PSP
اتر	fall	VBF
گئی	Been	AUXA
‘	‘	PU
ڈرم	drum	NN
کے	of	PSP
ہائی	High	JJ
ہیٹ	Heat	NN
سمبل	Symbol	NN
(	(	PU
تانبے	copper	NN
کی	of	PSP
پلیٹ	plate	NN
)	)	PU
کی	of	PSP
آواز	sound	NN
آتی	coming	VBF
ہے	Is	AUXT
۔	.	PU
ردم	rhythm	NN
میں	In	PSP
گٹار	guitar	NN
اور	and	CC
آرگن	Organ	NN
کی	of	PSP
آوازیں	Sounds	NN
بھی	also	PSP
شامل	included	JJ
ہوتی	would have	VBF
ہیں	Are	AUXT
اور	and	CC
سکرین	screen	NN
پر	on	PSP
چار	four	CD
جواں	young	JJ
سال	year	NN
لڑکے	Boy	NN
ساز	instrument	NN
بجاتے	playing	VBF
دکھائی	show	VBF
دیتے	give	AUXA
ہیں	Are	AUXT
۔	.	PU
کیمرہ	camera	NN
ماحول	atmosphere	NN
کی	of	PSP
شادابی	gladness	NN
اور	and	CC
سبزے	greens	NN
کے	of	PSP
درمیان	Among	NN
میں	In	PSP
سے	from	PSP
ایک	one	CD
جیپ	Zap	NN
کو	to	PSP
آتے	Come	VBF
دکھاتا	Shows	VBF
ہے	Is	AUXT
جس	Which	PRR
پر	on	PSP
یہ	this	PDM
لڑکے	Boy	NN
سوار	ride	NN
ہیں	Are	VBF
اور	and	CC
وہ	she	PRP
وطن	homeland	NN
سے	from	PSP
محبت	love	NN
کا	concerning	PSP
یہ	this	PDM
گیت	song	NN
گا	would be	AUXT
رہے	remain	AUXP
ہیں	Are	AUXT
’	’	PU
دل	heart	NN
دل	heart	NN
پاکستان	Pakistan	NNP
جان	life	NN
جان	life	NN
پاکستان	Pakistan	NNP
‘	‘	PU
۔	.	PU
یہ	this	PDM
1987	1987	NN
کی	of	PSP
بات	talk	NN
ہے	Is	VBF
جب	when	NN
یہ	this	PDM
تاریخ	history	NN
ساز	instrument	NN
ملی	national	JJ
نغمہ	melody	NN
جنید	Junaid	NNP
جمشید	Jamshed	NNP
نے	have	PSP
گایا	sung	NN
تھا	was	VBF
جبکہ	While	CC
روحیل	Rohail	NNP
حیات	Hayat	NNP
نصرت	Nusrat	NNP
حسین	Hussain	NNP
اور	and	CC
شہزاد	Shahzad	NNP
حسن	Hassan	NNP
ان	them	PRP
کے	of	PSP
ساتھی	companion	NN
تھے	were	VBF
۔	.	PU
پاکستان	Pakistan	NNP
کا	concerning	PSP
شمار	Count	NN
دنیا	world	NN
کے	of	PSP
ان	them	PRP
ممالک	Countries	NN
میں	In	PSP
ہوتا	would have	VBF
ہے	Is	AUXT
جہاں	where	NN
ملی	Found	JJ
نغمے	Songs	NN
بڑے	Large	JJ
بڑے	Large	JJ
استادوں	Teachers	NN
اور	and	CC
بادشاہانِ	Kings	NN
فن	art	NN
نے	have	PSP
گائے	cow	NN
جنھیں	who	PRR
فن	art	NN
موسیقی	music	NN
میں	In	PSP
یکتائے	oneness	NN
فن	art	NN
تسلیم	Accept	NN
کیا	what	VBF
گیا	Was	AUXA
تھا	was	AUXT
اور	and	CC
ان	them	PRP
کے	of	PSP
گائے	cow	NN
گیتوں	Songs	NN
کو	to	PSP
قبول	accepted	NN
عام	common	NN
بھی	also	PSP
ملا	mullah	VBF
لیکن	but	CC
'	'	PU
دل	heart	NN
دل	heart	NN
پاکستان	Pakistan	NNP
'	'	PU
ایسا	such	PDM
ملی	national	JJ
گیت	song	NN
رہا	remained	VBF
جس	Which	PRR
نے	have	PSP
مقبولیت	popularity	NN
کے	of	PSP
ریکارڈ	Record	NN
توڑے	break	NN
۔	.	PU
آج	today	NN
سے	from	PSP
34	34	CD
سال	year	NN
پہلے	before	NN
یہ	this	PDM
گیت	song	NN
وائٹل	Vital	NNP
سائنز	Signs	NNP
بینڈ	Band	NN
نے	have	PSP
گایا	sung	NN
تھا	was	VBF
۔	.	PU
اس	this	PDM
گیت	song	NN
کی	of	PSP
دھن	Riches	NN
استھائی	isthai	NN
(	(	PU
مکھڑا	face	NN
)	)	PU
ایرینجمنٹ	Erangement	NN
اور	and	CC
ویڈیو	Video	NN
بنانے	Create	VBI
کا	concerning	PSP
سہرا	credit	NN
ملک	country	NN
کے	of	PSP
نامور	eminent	JJ
ڈائریکٹر	Director	NN
شعیب	Shoaib	NNP
منصور	Mansur	NNP
کے	of	PSP
سر	head	NN
ہے	Is	VBF
جبکہ	While	CC
شاعری	poetry	NN
نثار	nisar	NNP
ناسک	Nashik	NNP
کی	of	VBF
تھی	had been	AUXT
۔	.	PU
اس	this	PDM
بینڈ	Band	NN
کے	of	PSP
مرکزی	Central	JJ
گلوکار	singer	NN
جنید	Junaid	NNP
جمشید	Jamshed	NNP
تو	thou	SC
اب	now	NN
اس	this	PDM
دنیا	world	NN
میں	In	PSP
نہیں	not	NEG
لیکن	but	CC
ان	them	PRP
کے	of	PSP
ساتھی	companion	NN
اور	and	CC
وائٹل	Vital	NNP
سائنز	Signs	NNP
کے	of	PSP
بیس	twenty	CD
گٹارسٹ	Guitarist	NN
شہزاد	Shahzad	NNP
حسن	Hassan	NNP
شاہی	royal	NNP
نے	have	PSP
اس	this	PDM
دور	far	NN
کو	to	PSP
یاد	memory	NN
کرتے	do	VBF
ہوئے	became	AUXA
بتایا	told	VBF
’	’	PU
یہ	this	PDM
1986	1986	NN
کی	of	PSP
بات	talk	NN
ہے	Is	VBF
۔	.	PU
ہم	we	PRP
پشاور	peshawar	NNP
یونیورسٹی	university	NN
سے	from	PSP
فارغ	Free	JJ
ہوئے	became	VBF
تھے	were	AUXT
۔	.	PU
سب	everybody	Q
شوقیہ	amateur	NN
طور	condition	NN
پر	on	PSP
میوزک	Music	NN
کر	do	VBF
رہے	remain	AUXP
تھے	were	AUXT
ہم	we	PRP
نے	have	PSP
ایک	one	CD
بینڈ	Band	NN
بنا	Create	VBF
رکھا	kept	AUXA
تھا	was	AUXT
جس	Which	PRR
میں	In	PSP
میرے	my	PRS
ساتھ	together	NN
بچپن	childhood	NN
کے	of	PSP
دوست	friend	NN
روحیل	Rohail	NNP
حیات	Hayat	NNP
پارٹنر	Partner	NN
تھے	were	VBF
اور	and	CC
کچھ	a few	Q
عرصہ	Period	NN
بعد	After	NN
نصرت	Nusrat	NNP
حسین	Hussain	NNP
بھی	also	PSP
شامل	included	JJ
ہوگئے	have become	NN
تھے	were	VBF
۔	.	PU
’	’	PU
وائٹل	Vital	NNP
سائنز	Signs	NNP
بنانے	Create	VBI
کا	concerning	PSP
قصہ	story	NN
بڑا	big	JJ
دلچسپ	interesting	JJ
ہے	Is	VBF
۔	.	PU
ہمارا	our	PRS
ووکلسٹ	vocalist	NN
ہمیں	We	PRP
چھوڑ	Leave	VBF
کر	do	SCK
کسی	A	PDM
دوسرے	Other	OD
بینڈ	Band	NN
میں	In	PSP
چلا	Run	VBF
گیا	Was	AUXA
تھا	was	AUXT
تو	thou	SC
ان	them	PRP
دنوں	Days	NN
ہمیں	We	PRP
اپنے	Your	APNA
میوزک	Music	NN
بینڈ	Band	NN
کے	of	PSP
لیے	To	PSP
ایک	one	CD
گلوکار	singer	NN
کی	of	PSP
تلاش	search	NN
تھی	had been	VBF
۔	.	PU
ایک	one	CD
دن	day	NN
بازار	marketplace	NN
میں	In	PSP
جنید	Junaid	NNP
جمشید	Jamshed	NNP
سے	from	PSP
ملاقات	meeting	NN
ہوئی	happened	VBF
تو	thou	SC
خیال	opinion	NN
آیا	Came	VBF
کیوں	why	RB
نہ	not	NEG
اسے	him	PRP
اپنے	Your	APNA
بینڈ	Band	NN
میں	In	PSP
شامل	included	JJ
کیا	what	VBF
جائے	Be	AUXA
؟	?	PU
ہم	we	PRP
سب	everybody	Q
چونکہ	Since	SC
چھاؤنیوں	Cantonments	NN
میں	In	PSP
رہتے	Live	VBF
تھے	were	AUXT
لہٰذا	So	SC
ایک	one	CD
دوسرے	Other	OD
کو	to	PSP
جانتے	Know	VBF
تھے	were	AUXT
ہم	we	PRP
نے	have	PSP
جنید	Junaid	NNP
کو	to	PSP
اپنے	Your	APNA
بینڈ	Band	NN
میں	In	PSP
شامل	included	JJ
ہونے	be	VBI
کی	of	PSP
دعوت	feast	NN
دی	the	VBF
تو	thou	SC
اس	this	PRP
نے	have	PSP
کہا	Said	VBF
ٹھیک	well	JJ
ہے	Is	VBF
میں	In	PRP
تو	thou	SC
میوزک	Music	NN
کو	to	PSP
سنجیدگی	seriousness	NN
سے	from	PSP
کرنا	do	VBI
چاہتا	Want	AUXM
ہوں	Am	AUXT
لیکن	but	SCP
میرے	my	PRS
ساتھی	companion	NN
میوزک	Music	NN
میں	In	PSP
دلچسپی	interest	NN
نہیں	not	NEG
لے	Take	VBF
رہے	remain	AUXP
اس	this	PRP
نے	have	PSP
ہمیں	We	PRP
اپنا	own	APNA
میوزک	Music	NN
کنسرٹ	concert	NN
سننے	Listen	VBI
کی	of	PSP
دعوت	feast	NN
دی	the	VBF
۔	.	PU
جنید	Junaid	NNP
کی	of	PSP
دعوت	feast	NN
پر	on	PSP
روحیل	Rohail	NNP
حیات	Hayat	NNP
نصرت	Nusrat	NNP
حسین	Hussain	NNP
اور	and	CC
میں	In	PSP
اس	this	PRP
کا	concerning	PSP
کنسرٹ	concert	NN
سننے	Listen	VBI
گئے	went	AUXA
جنید	Junaid	NNP
نے	have	PSP
اس	this	PDM
رات	night	NN
وہاں	there	NN
بہت	very	Q
عمدہ	Excellent	JJ
پرفارم	perform	NN
کیا	what	VBF
اور	and	CC
اس	this	PRP
کے	of	PSP
بعد	After	NN
ہم	we	PRP
نے	have	PSP
اکٹھے	Together	JJ
ہوکر	be	NN
وائٹل	Vital	NN
سائنز	Signs	NN
بنایا	Made	VBF
اور	and	CC
باقاعدگی	Regular	NN
سے	from	PSP
گانا	song	NN
شروع	beginning	NN
کر	do	VBF
دیا	lamp	AUXA
۔	.	PU
'	'	PU
دل	heart	NN
دل	heart	NN
پاکستان	Pakistan	NNP
'	'	PU
دل	heart	NN
سے	from	PSP
گایا	sung	NN
اور	and	CC
تاریخ	history	NN
بن	Bin	VBF
گئی	Been	AUXA
شہزاد	Shahzad	NNP
حسن	Hassan	NNP
نے	have	PSP
بتایا	told	VBF
کہ	that	SC
یہ	this	PDM
وہ	she	PRP
وقت	time	NN
تھا	was	VBF
جب	when	NN
وہ	she	PRP
اور	and	CC
ان	them	PRP
کے	of	PSP
ساتھی	companion	NN
انگریزی	English	NNP
موسیقی	music	NN
اور	and	CC
گانے	Songs	NN
سنتے	Hear	VBF
تھے	were	AUXT
۔	.	PU
’	’	PU
نازیہ	Nazia	NNP
حسن	Hassan	NNP
اور	and	CC
زوہیب	Zohaib	NNP
ہماری	Our	PRS
انسپریشن	inspiration	NN
تھے	were	VBF
دل	heart	NN
دل	heart	NN
پاکستان	Pakistan	NNP
کی	of	PSP
دھن	Riches	NN
اور	and	CC
کمپوزیشن	Writing	NN
بھی	also	PSP
مغربی	western	JJ
انداز	manner	NN
سے	from	PSP
کی	of	VBF
گئی	Been	AUXA
تھی	had been	AUXT
جو	who	PRR
ہم	we	PRP
پر	on	PSP
جچی	suited	NN
تھی	had been	VBF
۔	.	PU
ان	them	PRP
کا	concerning	PSP
کہنا	say	VBI
تھا	was	AUXT
کہ	that	SC
’	’	PU
دل	heart	NN
دل	heart	NN
پاکستان	Pakistan	NNP
کا	concerning	PSP
آئیڈیا	idea	NN
شعیب	Shoaib	NNP
منصور	Mansur	NNP
کا	concerning	PSP
تھا	was	VBF
۔	.	PU
اصل	origin	NN
میں	In	PSP
ہوا	air	VBF
یہ	this	PDM
تھا	was	VBF
کہ	that	SC
جشنِ	celebration	NN
آزادی	freedom	NN
کے	of	PSP
موقعے	opportunity	NN
پر	on	PSP
پی ٹی وی	PTV	NNP
میں	In	PSP
ملی	national	JJ
ترانوں	Anthems	NN
کا	concerning	PSP
ایک	one	CD
مقابلہ	competition	NN
کروایا	made	VBF
جا	Be	AUXA
رہا	remained	AUXP
تھا	was	AUXT
جس	Which	PRR
میں	In	PSP
نوجوان	young	JJ
گلوکاروں	Singers	NN
کو	to	PSP
یہ	this	PDM
ہدف	target	NN
دیا	lamp	VBF
گیا	Was	AUXA
تھا	was	AUXT
کہ	that	SC
وہ	she	PRP
اپنے	Your	APNA
بینڈ	Band	NN
کے	of	PSP
ساتھ	together	NN
ترانہ	anthem	NN
تیار	ready	JJ
کریں	do	VBF
۔	.	PU
شعیب	Shoaib	NNP
صاحب	sir	NN
نے	have	PSP
لاہور	lahore	NNP
سے	from	PSP
رابطہ	contact	NN
کیا	what	VBF
ہم	we	PRP
لوگ	people	NN
راولپنڈی	Rawalpindi	NNP
میں	In	PSP
تھے	were	VBF
انھوں	They	PRP
نے	have	PSP
بتایا	told	VBF
کہ	that	SC
اس	this	PRP
طرح	like	NN
یہ	this	PDM
بول	utterance	VBF
ہیں	Are	AUXT
اور	and	CC
پھر	again	RB
انھوں	They	PRP
نے	have	PSP
ہمیں	We	PRP
اس	this	PRP
کی	of	PSP
دھن	Riches	NN
یاد	memory	NN
کرائی	krai	VBF
۔	.	PU
شعیب	Shoaib	NNP
صاحب	sir	NN
نے	have	PSP
استھائی	isthai	NN
تیار	ready	JJ
کی	of	VBF
ہوئی	happened	AUXA
تھی	had been	AUXT
پھر	again	SC
باقاعدہ	regular	JJ
شاعری	poetry	NN
کے	of	PSP
لیے	To	PSP
نثار	nisar	NNP
ناسک	Nashik	NNP
صاحب	sir	NN
کی	of	PSP
خدمات	Services	NN
حاصل	gain	NN
کی	of	VBF
گئیں	Were	AUXA
۔	.	PU
چند	few	Q
دن	day	NN
ریہرسل	rehearsal	NN
کرنے	To	VBI
کے	of	PSP
بعد	After	NN
اس	this	PRP
کی	of	PSP
آڈیو	Audio	NN
ریکارڈ	Record	NN
نگ	ng	NN
کی	of	VBF
گئی	Been	AUXA
۔	.	PU
آڈیو	Audio	NN
تیار	ready	JJ
ہو	be	VBF
گئی	Been	AUXA
تو	thou	SC
اسلام آباد	Islamabad	NNP
میں	In	PSP
شکرپڑیاں	Shakarparian	NNP
گالف	Golf	NNP
کلب	club	NN
اور	and	CC
شاہراہ دستور	Constitution Road	NNP
پر	on	PSP
اس	this	PRP
کی	of	PSP
ویڈیو	Video	NN
کی	of	PSP
شوٹنگ	Shooting	NN
کر	do	VBF
لی	Lee	AUXA
گئی	Been	AUXA
۔	.	PU
‘	‘	PU
شہزاد	Shahzad	NNP
حسن	Hassan	NNP
نے	have	PSP
بتایا	told	VBF
کہ	that	SC
یہ	this	PDM
گیت	song	NN
14	14	NNP
اگست	August	NNP
کے	of	PSP
موقعے	opportunity	NN
پر	on	PSP
ہی	hey	NN
پیش	presented	NN
کیا	what	VBF
گیا	Was	AUXA
تھا	was	AUXT
۔	.	PU
’	’	PU
چند	few	Q
دنوں	Days	NN
میں	In	PSP
یہ	this	PDM
ملی	national	JJ
ترانہ	anthem	NN
پاکستان	Pakistan	NNP
بھر	throughout	JJ
میں	In	PSP
مشہور	famous	JJ
ہو	be	VBF
گیا	Was	AUXA
تھا	was	AUXT
۔	.	PU
ہم	we	PRP
نے	have	PSP
اس	this	PDM
طرح	like	NN
کے	of	PSP
زبردست	Great	JJ
فیڈ	feed	NN
بیک	Back	NN
سے	from	PSP
متعلق	About	RB
کبھی	ever	NN
سوچا	Thought	VBF
بھی	also	PSP
نہیں	not	NEG
تھا	was	VBF
۔	.	PU
ہم	we	PRP
جہاں	where	NN
جاتے	go	VBF
لوگوں	People	NN
کا	concerning	PSP
ہجوم	the crowd	NN
اکٹھا	Together	JJ
ہو	be	VBF
جاتا	goes	AUXA
لوگ	people	NN
ہمیں	We	PRP
سڑکوں	Roads	NN
اور	and	CC
بازاروں	Markets	NN
میں	In	PSP
روک	Stop	VBF
لیتے	Take	AUXA
تھے	were	AUXT
آٹو	Auto	NN
گراف	Graph	NN
اور	and	CC
تصویریں	Pictures	NN
بناتے	Create	VBF
ہوئے	became	AUXA
گھنٹوں	Hours	NN
گزر	carrot	VBF
جاتے	go	AUXA
تھے	were	AUXT
۔	.	PU
‘	‘	PU
تاریخ	history	NN
ساز	instrument	NN
مقبولیت کی	popularity of	NN
وجہ	reason	NN
کیا	what	RB
بنی	bani	VBF
؟	?	PU
'	'	PU
دل	heart	NN
دل	heart	NN
پاکستان	Pakistan	NNP
'	'	PU
کی	of	PSP
تاریخ	history	NN
ساز	instrument	NN
مقبولیت	popularity	NN
کی	of	PSP
وجہ	reason	NN
کیا	what	RB
بنی	bani	VBF
تھی	had been	AUXT
اس	this	PDM
سوال	question	NN
کے	of	PSP
جواب	answer	NN
میں	In	PSP
شہزاد	Shahzad	NNP
حسن	Hassan	NNP
نے	have	PSP
کہا	Said	VBF
کہ	that	SC
’	’	PU
میرے	my	PRS
خیال	opinion	NN
میں	In	PSP
اس	this	PRP
کی	of	PSP
سب	everybody	Q
سے	from	PSP
بڑی	Large	JJ
وجہ	reason	NN
تو	thou	SC
سادگی	simplicity	NN
ہے	Is	VBF
۔	.	PU
‘	‘	PU
ان	them	PRP
کا	concerning	PSP
کہنا	say	VBI
تھا	was	AUXT
’	’	PU
آپ	you	PRP
دیکھیں	See	VBF
اس	this	PDM
گیت	song	NN
کا	concerning	PSP
مکھڑا	face	NN
کتنا	how much	Q
سادہ	plain	JJ
ہے	Is	VBF
’	’	PU
دل	heart	NN
دل	heart	NN
پاکستان	Pakistan	NNP
جان	life	NN
جان	life	NN
پاکستان	Pakistan	NNP
‘	‘	PU
۔	.	PU
جس	Which	PRR
طرح	like	NN
یہ	this	PDM
مصرعہ	misrah	NN
لکھنے	Write	VBI
اور	and	CC
پڑھنے	Read	VBI
میں	In	PSP
آسانی	ease	NN
سے	from	PSP
یاد	memory	NN
ہو	be	VBF
جاتا	goes	AUXA
ہے	Is	AUXT
اس	this	PRP
کی	of	PSP
دھن	Riches	NN
کمپوزیشن	composition	NN
اور	and	CC
ایرینجمنٹ	arrangement	NN
میں	In	PSP
بھی	also	PSP
سادہ	plain	JJ
تھی	had been	VBF
۔	.	PU
شعیب	Shoaib	NNP
منصور	Mansur	NNP
پڑھے	Read	NN
لکھے	Written	VBF
اور	and	CC
ذہین	sagacious	JJ
انسان	human being	NN
ہیں	Are	VBF
وہ	she	PRP
اچھی	good	JJ
طرح	like	NN
جانتے	Know	VBF
ہیں	Are	AUXT
کہ	that	PU
اگر	what if	SCP
کسی	A	PDM
گیت	song	NN
یا	or	CC
نعرے	slogans	NN
کو	to	PSP
زیادہ	more	Q
سے	from	PSP
زیادہ	more	Q
لوگوں	People	NN
تک	until	PSP
پہنچانا	convey	VBI
ہے	Is	AUXT
تو	thou	SC
پھر	again	RB
سادگی	simplicity	NN
سب	everybody	Q
سے	from	PSP
اہم	important	JJ
ذریعہ	By	NN
ثابت	established	NN
ہو	be	VBF
سکتی	Can	AUXM
ہے	Is	AUXT
۔	.	PU
‘	‘	PU
ان	them	PRP
کا	concerning	PSP
کہنا	say	VBI
تھا	was	AUXT
کہ	that	SC
’	’	PU
دل	heart	NN
دل	heart	NN
پاکستان	Pakistan	NNP
‘	‘	PU
کی	of	PSP
سب	everybody	Q
سے	from	PSP
بڑی	Large	JJ
خوبی	good	NN
یہ	this	PDM
تھی	had been	VBF
کہ	that	SC
جس	Which	PRD
نے	have	PSP
بھی	also	PSP
سنا	senna	VBF
اسے	him	PRP
یاد	memory	NN
ہو	be	VBF
گیا	Was	AUXA
جس	Which	PRR
نے	have	PSP
بھی	also	PSP
ترانہ	anthem	NN
گایا	sung	NN
اس	this	PRP
کے	of	PSP
دل	heart	NN
میں	In	PSP
اتر	northern	VBF
گیا	Was	AUXA
۔	.	PU
ہم	we	PRP
نے	have	PSP
دیکھا	Seen	VBF
کہ	that	SC
اس	this	PRP
ترانے	anthems	NN
کو	to	PSP
گلی	street	NN
محلوں	neighborhoods	NN
سکول	school	NN
کالج	college	NN
یونیورسٹی	university	NN
مدرسوں	Madrasas	NN
سب	everybody	Q
جگہ	place	NN
گایا	sung	NN
گیا	Was	VBF
ہے	Is	AUXT
۔	.	PU
شہزاد	Shahzad	NNP
حسن	Hassan	NNP
نے	have	PSP
کہا	Said	VBF
کہ	that	SC
'	'	PU
دل	heart	NN
دل	heart	NN
پاکستان	Pakistan	NNP
'	'	PU
کو	to	PU
اگر	what if	SCP
پاکستان	Pakistan	NNP
کا	concerning	PSP
دوسرا	second	OD
قومی	national	JJ
ترانہ	anthem	NN
کہا	Said	VBF
جاتا	goes	AUXA
ہے	Is	AUXT
تو	thou	SC
اس	this	PRP
کی	of	PSP
سب	everybody	Q
سے	from	PSP
بڑی	Large	JJ
وجہ	reason	NN
تو	thou	SC
یہ	this	PDM
ہے	Is	VBF
کہ	that	SC
یہ	this	PDM
نغمہ	melody	NN
نہیں	not	NEG
دل	heart	NN
کی	of	PSP
بات	talk	NN
تھی	had been	VBF
اور	and	CC
دلوں	Hearts	NN
میں	In	PSP
اتر	northern	VBF
گئی	Been	AUXA
تھی	had been	AUXT
۔	.	PU
دوسری	Second	OD
اہم	important	JJ
وجہ	reason	NN
یہ	this	PRP
بھی	also	PSP
ہے	Is	VBF
کہ	that	SC
اسے	him	PRP
میڈیا	Media	NN
نے	have	PSP
کبھی	ever	NN
بُھولنے	forgetting	NN
نہیں	not	NEG
دیا	lamp	VBF
۔	.	PU
ریاست	state	NN
حکومت	government	NN
میڈیا	Media	NN
اور	and	CC
عوام	Public	NN
نے	have	PSP
'	'	PU
دل	heart	NN
دل	heart	NN
پاکستان	Pakistan	NNP
'	'	PU
کو	to	PSP
وطن	homeland	NN
سے	from	PSP
محبت	love	NN
کا	concerning	PSP
اظہاریہ	expressive	NN
بنائے	Created	VBF
رکھا	kept	AUXA
جس	Which	PRR
کی	of	PSP
وجہ	reason	NN
ہے	Is	VBF
کہ	that	SC
یہ	this	PDM
گیت	song	NN
چوتھی	Fourth	OD
دہائی	decade	NN
کی	of	PSP
طرف	side	NN
گامزن	ongoing	JJ
ہے	Is	VBF
۔	.	PU
گلوکار	singer	NN
جواد	jawad	NNP
احمد	Ahmed	NNP
کا	concerning	PSP
کہنا	say	VBI
ہے	Is	AUXT
کہ	that	SC
دراصل	Actually	RB
'	'	PU
دل	heart	NN
دل	heart	NN
پاکستان	Pakistan	NNP
'	'	PU
ان	them	PRP
ملی	national	JJ
ترانوں	Anthems	NN
کا	concerning	PSP
تسلسل	continuity	NN
ہی	hey	NN
تھا	was	VBF
جو	who	PRR
اساتذہ	Teachers	NN
نے	have	PSP
گائے	cow	NN
تھے	were	VBF
لیکن	but	CC
اسے	him	PRP
جدید	modern	JJ
انداز	manner	NN
میں	In	PSP
بنایا	Made	VBF
گیا	Was	AUXA
تھا	was	AUXT
۔	.	PU
شام	evening	NN
چوراسی	eighty-four	CD
گھرانے	Family	NN
گلوکار	singer	NN
رفاقت	Fellowship	NNP
علی	Ali	NNP
خان	khan	NNP
نے	have	PSP
اس	this	PDM
گانے	Songs	NN
پر	on	PSP
بات	talk	NN
کرتے	do	VBF
ہوئے	became	AUXA
کہا	Said	VBF
کہ	that	SC
’	’	PU
میرا	My	PRS
تعلق	relationship	NN
اگرچہ	although	SCP
کلاسیکی	Classic	NN
گھرانے	Family	NN
سے	from	PSP
ہے	Is	VBF
لیکن	but	CC
میں	In	PSP
ایک	one	CD
عرصہ	Period	NN
سے	from	PSP
پاپ	sin	NN
اور	and	CC
کلاسیکی	Classic	NN
موسیقی	music	NN
کا	concerning	PSP
فیوژن	fusion	NN
بھی	also	PSP
کررہا	doing	NN
ہوں	I	VBF
اس	this	PRP
لیے	To	PSP
'	'	PU
دل	heart	NN
دل	heart	NN
پاکستان	Pakistan	NNP
'	'	PU
پر	on	PSP
کھلے	Open	JJ
دل	heart	NN
سے	from	PSP
بات	talk	NN
کر	do	VBF
سکتا	Can	AUXM
ہوں	Am	AUXT
۔	.	PU
‘	‘	PU
’	’	PU
دل	heart	NN
دل	heart	NN
پاکستان	Pakistan	NNP
ایک	one	CD
آسان	easy	JJ
میلوڈی	Melody	NN
ہے	Is	VBF
جس	Which	PRR
پر	on	PSP
مغربی	western	JJ
موسیقی	music	NN
کی	of	PSP
چھاپ	Print	NN
نمایاں	prominent	JJ
ہے	Is	VBF
اور	and	CC
اس	this	PRP
کی	of	PSP
شاعری	poetry	NN
بھی	also	PSP
آسان	easy	JJ
ہلکی	Light	JJ
پھلکی	fluffy	NN
اور	and	CC
غیر	non-	JJ
روایتی	conventional	JJ
ہے	Is	VBF
۔	.	PU
گورے	white	JJ
چٹے	chitte	NN
گلوکار	singer	NN
جینز	Genes	NN
جیکٹ	jacket	NN
پہنے	wear	VBF
ہوئے	became	AUXA
ہاتھوں	Hands	NN
میں	In	PSP
آرگن	Organ	NN
اور	and	CC
گٹاریں	Guitars	NN
پکڑی	caught	VBF
ہوئیں	Were	AUXA
لوگوں	People	NN
کو	to	PSP
اچھے	Good	JJ
لگے	take	VBF
۔	.	PU
‘	‘	PU
انھوں	They	PRP
نے	have	PSP
کہا	Said	VBF
کہ	that	SC
’	’	PU
ملی	national	JJ
ترانے	anthems	NN
عموماً	usually	RB
جنگی	warlike	JJ
ترانے	anthems	NN
بھی	also	PSP
ہوتے	are	VBF
ہیں	Are	AUXT
جس	Which	PRR
میں	In	PSP
دشمن	enemy	NN
کے	of	PSP
چھکے	sixes	NN
چھڑانے	redeem	NN
کی	of	PSP
بات	talk	NN
کی	of	VBF
جاتی	jati	AUXA
ہے	Is	AUXT
لیکن	but	SCP
اس	this	PDM
ملی	national	JJ
گیت	song	NN
میں	In	PSP
دشمن	enemy	NN
سے	from	PSP
لڑنے	Fight	VBI
جھگڑنے	quarrelling	NN
کی	of	PSP
بجائے	instead	PSP
'	'	PU
بڑھتی	Increasing	VBF
رہے	remain	AUXP
یہ	this	PDM
روشنی	light	NN
چلتا	Walks	VBF
رہے	remain	AUXP
یہ	this	PDM
کارواں	caravan	NN
'	'	PU
جیسی	Like	PRR
بات	talk	NN
کی	of	VBF
گئی	Been	AUXA
ہے	Is	AUXT
۔	.	PU
میرے	my	PRS
خیال	opinion	NN
میں	In	PSP
یہ	this	PDM
بڑی	Large	JJ
بہترین	so good	JJ
سوچ	thinking	VBF
ہے	Is	AUXT
۔	.	PU
‘	‘	PU
ان	them	PRP
کے	of	PSP
مطابق	according	NN
’	’	PU
دل	heart	NN
دل	heart	NN
پاکستان	Pakistan	NNP
'	'	PU
کی	of	PSP
غیر	non-	JJ
معمولی	normal	JJ
مقبولیت	popularity	NN
کی	of	PSP
بڑی	Large	JJ
وجہ	reason	NN
تو	thou	SC
اس	this	PRP
کی	of	PSP
سادہ	plain	JJ
اور	and	CC
دل	heart	NN
میں	In	PSP
اتر	northern	VBF
جانے	Go	AUXA
والی	volley	VALA
میلوڈی	Melody	NN
کے	of	PSP
علاوہ	moreover	PSP
اس	this	PRP
کی	of	PSP
غیر	non-	JJ
معمولی	normal	JJ
پروموشن	promotion	NN
بھی	also	PSP
ہے	Is	VBF
جس	Which	PRR
کے	of	PSP
باعث	Because	NN
آج	today	NN
چونتیس	thirty-four	NN
پینتیس	thirty-five	CD
سال	year	NN
بعد	After	NN
بھی	also	PSP
’	’	PU
دل	heart	NN
دل	heart	NN
پاکستان	Pakistan	NNP
‘	‘	PU
لوگوں	People	NN
کی	of	PSP
زبان	language	NN
پر	on	PSP
ہے	Is	VBF
۔	.	PU
اے	O	INJ
مشت	clenched hand	NN
خاک	ash	NN
:	:	PU
اداکارہ	actress	NN
عفت	iffatt	NNP
عمر	Umar	NNP
’	’	PU
متنازع	Controversial	NN
‘	‘	PU
ڈرامے	Drama	NN
کا	concerning	PSP
حصہ	part	NN
بننے	Become	VBI
پر	on	PSP
’	’	PU
شرمندہ	ashamed	JJ
‘	‘	PU
کیوں	why	RB
ہیں	Are	VBF
؟	?	PU
’	’	PU
جب	when	NN
میں	In	PSP
نے	have	PSP
سکرپٹ	Script	NN
پڑھا	Read	VBF
تو	thou	SC
مجھے	me	PRP
اس	this	PRP
سے	from	PSP
نفرت	hate	NN
ہوئی	happened	VBF
کیونکہ	because	SC
اس	this	PRP
کی	of	PSP
زبان	language	NN
وہ	she	PRP
نہیں	not	NEG
جو	who	PRR
عام	common	JJ
زندگی	life	NN
میں	In	PSP
آپ	you	PRP
بولتے	Speak	VBF
ہیں	Are	AUXT
۔	.	PU
پھر	again	SC
میری	My	PRS
ملاقات	meeting	NN
ہدایتکار	director	NN
احسن	Ahsan	NNP
تالش	Talash	NNP
سے	from	PSP
ہوئی	happened	VBF
جن	whose	PRR
کے	of	PSP
ذہن	mind	NN
میں	In	PSP
تھا	was	VBF
کہ	that	SC
ہم	we	PRP
نے	have	PSP
اسے	him	PRP
ایسے	such	PDM
ہی	hey	NN
کرنا	do	VBI
ہے	Is	AUXT
۔	.	PU
آج	today	NN
کل	tomorrow	NN
سکرپٹ	Script	NN
میں	In	PSP
اندھوں	the blind	NN
میں	In	PSP
کانا	dumb	NN
راجا	king	NN
کا	concerning	PSP
انتخاب	choice	NN
کرنا	do	VBI
ہوتا	would have	AUXA
ہے	Is	AUXT
اور	and	CC
یہ	this	PDM
وہی	same	PDM
کانا	one-eyed	NN
راجا	king	NN
تھا	was	VBF
۔	.	PU
‘	‘	PU
یہ	this	PDM
کہنا	say	VBI
ہے	Is	AUXT
اداکارہ	actress	NN
عفت	Iffat	NNP
عمر	Umar	NNP
کا	concerning	PSP
جو	who	PRD
ان	them	PRP
دنوں	Days	NN
ڈرامہ	Drama	NN
’	’	PU
اے	O	INJ
مشت	clenched hand	NN
خاک	ash	NN
‘	‘	PU
میں	In	PSP
فیروز	Firoz	NNP
خان	khan	NNP
(	(	PU
مستجاب	Mustajab	NNP
)	)	PU
کی	of	PSP
والدہ	Mother	NN
کا	concerning	PSP
کردار	role	NN
ادا	paid	NN
کر	do	VBF
رہی	remained	AUXP
ہیں	Are	AUXT
۔	.	PU
اس	this	PDM
ڈرامے	Drama	NN
کو	to	PSP
لے	Take	VBF
کر	do	SCK
سوشل	Social	JJ
میڈیا	Media	NN
پر	on	PSP
تنقید	criticism	NN
کی	of	VBF
جاتی	jati	AUXA
رہی	remained	AUXP
ہے	Is	AUXT
کہ	that	SC
اس	this	PRP
میں	In	PSP
بغیر	without	PSP
کسی	A	PDM
وارننگ	Warning	NN
کے	of	PSP
خواتین	Women	NN
پر	on	PSP
تشدد	violence	NN
کے	of	PSP
مناظر	Views	NN
کو	to	PSP
شامل	included	JJ
کیا	what	VBF
گیا	Was	AUXA
ہے	Is	AUXT
۔	.	PU
صحافی	journalist	NN
براق	Barak	NNP
شبیر	Shabbir	NNP
کو	to	PSP
دیے	given	VBF
گئے	went	AUXA
انٹرویو	interview	NN
میں	In	PSP
عفت	Iffat	NNP
عمر	Umar	NNP
کا	concerning	PSP
’	’	PU
اے	O	INJ
مشت	clenched hand	NN
خاک	ash	NN
‘	‘	PU
کے	of	PSP
سکرپٹ	Script	NN
پر	on	PSP
کہنا	say	VBI
تھا	was	AUXT
کہ	that	SC
’	’	PU
اگر	what if	SCP
مجھے	me	PRP
سکرپٹ	Script	NN
پسند	Like	NN
نہیں	not	NEG
آیا	Came	VBF
تو	thou	SC
یہ	this	PDM
مطلب	meaning	NN
نہیں	not	NEG
کہ	that	SC
پبلک	Public	NN
کو	to	PSP
بھی	also	PSP
پسند	Like	NN
نہیں	not	NEG
آیا	Came	VBF
۔	.	PU
مجھے	me	PRP
تو	thou	SC
بہت	very	Q
سی	C	JJ
چیزیں	Things	NN
پسند	Like	NN
نہیں	not	NEG
آتیں	come	VBF
جو	who	PRR
بہت	very	Q
ہِٹ	Hit	NN
ہو	be	VBF
رہی	remained	AUXP
ہوتی	would have	AUXA
ہیں	Are	AUXT
۔	.	PU
لوگ	people	NN
اسے	him	PRP
بہت	very	Q
زیادہ	more	Q
پسند	Like	NN
کر	do	VBF
رہے	remain	AUXP
ہیں	Are	AUXT
۔	.	PU
‘	‘	PU
ان	them	PRP
کا	concerning	PSP
کہنا	say	VBI
تھا	was	AUXT
کہ	that	SC
’	’	PU
مجھے	me	PRP
اس	this	PRP
میں	In	PSP
یہی	This	PDM
چیز	thing	NN
اچھی	good	JJ
لگی	took	VBF
تھی	had been	AUXT
کہ	that	SC
اس	this	PRP
میں	In	PSP
ماں	mother	NN
کا	concerning	PSP
کوئی	any	PDM
کام	work	NN
ہے	Is	VBF
۔	.	PU
ظاہر	appear	NN
ہے	Is	VBF
میں	In	PRP
مرکزی	Central	JJ
کردار	role	NN
کرتے	do	VBF
ہوئے	became	AUXA
کریکٹر	character	NN
کردار	role	NN
کرنے	To	VBI
والے	the ones	VALA
اداکاروں	Actors	NN
میں	In	PSP
آئی	i	VBF
ہوں	Am	AUXT
۔	.	PU
میرے	my	PRS
لیے	To	PSP
یہ	this	PDM
انتخاب	choice	NN
آسان	easy	JJ
نہیں	not	NEG
کہ	that	SC
چائے	tea	NN
والی	volley	VALA
ماں	mother	NN
بن	Bin	VBF
جاؤں	Go	AUXA
۔	.	PU
مجھے	me	PRP
گہرے	Deep	JJ
کردار	role	NN
دیں	give	VBF
میں	In	PRP
وہ	she	PRP
کروں	I	VBF
گی	Will	AUXT
۔	.	PU
میں	In	PRP
ایک	one	CD
اداکار	actor	NN
ہوں	I	VBF
مجھے	me	PRP
اسی	same	PRP
کے	of	PSP
پیسے	Money	NN
ملتے	meet	VBF
ہیں	Are	AUXT
۔	.	PU
‘	‘	PU
’	’	PU
اس	this	PRP
عمر	age	NN
میں	In	PSP
آپ	you	PRP
کی	of	PSP
ذمہ	responsible	NN
داری	dari	NN
ہوتی	would have	VBF
ہے	Is	AUXT
کہ	that	SC
آپ	you	PRP
جو	who	PRR
کر	do	VBF
رہے	remain	AUXP
ہو	be	AUXT
آپ	you	PRP
اس	this	PRP
سے	from	PSP
متفق	Agree	JJ
ہوں	I	VBF
۔	.	PU
اے	O	INJ
مشت	clenched hand	NN
خاک	ash	NN
میں	In	PSP
جو	who	PRD
تشدد	violence	NN
دکھایا	Displayed	VBF
گیا	Was	AUXA
ہے	Is	AUXT
بچے	Child	NN
کا	concerning	PSP
کردار	role	NN
جیسا	As	PRR
دکھایا	Displayed	VBF
گیا	Was	AUXA
ہے	Is	AUXT
آپ	you	PRP
کو	to	PSP
یہ	this	PDM
چیزیں	Things	NN
نہیں	not	NEG
دکھانی	show	NN
چاہییں	should	NN
میں	In	PSP
اس	this	PRP
کے	of	PSP
بالکل	absolutely	RB
خلاف	against	JJ
ہوں	I	VBF
۔	.	PU
‘	‘	PU
’	’	PU
اگر	what if	SCP
دکھانی	show	NN
بھی	also	PSP
ہیں	Are	VBF
تو	thou	SC
تنبیہ	warning	NN
دے	Give	VBF
کر	do	SCK
دکھائیں	display	VBF
کہ	that	SC
یہ	this	PDM
غلط	wrong	JJ
ہو	be	VBF
رہا	remained	AUXP
ہے	Is	AUXT
۔	.	PU
میں	In	PRP
پراجیکٹ	Project	NN
کا	concerning	PSP
حصہ	part	NN
ہوں	I	VBF
لیکن	but	CC
میں	In	PSP
تشدد	violence	NN
دکھانے	Display	VBI
کے	of	PSP
خلاف	against	JJ
ہوں	I	VBF
۔	.	PU
۔	.	PU
۔	.	PU
میں	In	PRP
کسی	A	PDM
حد	limit	NN
تک	until	PSP
اس	this	PRP
پر	on	PSP
شرمندہ	ashamed	JJ
بھی	also	PSP
ہوں	I	VBF
۔	.	PU
‘	‘	PU
اس	this	PDM
ڈرامے	Drama	NN
کی	of	PSP
ایک	one	CD
قسط	Part	NN
میں	In	PSP
مرکزی	Central	JJ
کردار	role	NN
مستجاب	Mustajab	NNP
(	(	PU
فیروز	Firoz	NNP
خان	khan	NNP
)	)	PU
اپنی	Your	APNA
سابقہ	prefix	JJ
گرل	girl	NN
فرینڈ	friend	NN
شیزہ	Shiza	NNP
(	(	PU
نمرہ	Nimra	NNP
خان	khan	NNP
)	)	PU
کا	concerning	PSP
گلا	throat	NN
دباتا	suppresses	VBF
ہے	Is	AUXT
اور	and	CC
گلے	Throat	NN
سے	from	PSP
پکڑ	catch	VBF
کر	do	SCK
گھسیٹتے	Dragging	NN
ہوئے	became	VBF
صوفے	Sofas	NN
پر	on	PSP
پٹخ	pitch	NN
دیتا	give	VBF
ہے	Is	AUXT
۔	.	PU
اس	this	PDM
ڈرامے	Drama	NN
میں	In	PSP
اداکار	actor	NN
فیروز	Firoz	NNP
خان	khan	NNP
اور	and	CC
ثنا	Sana	NNP
جاوید	Javed	NNP
مرکزی	Central	JJ
کردار	role	NN
ادا	paid	NN
کر	do	VBF
رہے	remain	AUXP
ہیں	Are	AUXT
۔	.	PU
جس	Which	PRR
میں	In	PSP
فیروز	Firoz	NNP
خان	khan	NNP
کو	to	PSP
ایک	one	CD
بگڑے	spoiled	VBF
ہوئے	became	AUXA
ضدی	stubborn	JJ
انا	Anna	NNP
پرست	pious	NN
اور	and	CC
مذہب	religion	NN
بیزار	disgusted	JJ
شخص	person	NN
دکھایا	Displayed	VBF
گیا	Was	AUXA
ہے	Is	AUXT
جو	who	PRR
دعا	prayer	NNP
(	(	PU
ثنا	Sana	NNP
جاوید	Javed	NNP
)	)	PU
کی	of	PSP
محبت	love	NN
میں	In	PSP
گرفتار	arrested	JJ
ہو	be	VBF
کر	do	SCK
اس	this	PRP
سے	from	PSP
شادی	marriage	NN
کر	do	VBF
لیتا	Takes	AUXA
ہے	Is	AUXT
۔	.	PU
اے	O	INJ
مشت	clenched hand	NN
خاک	ash	NN
کا	concerning	PSP
حوالہ	reference	NN
دیتے	give	VBF
ہوئے	became	AUXA
عفت	Iffat	NNP
عمر	Umar	NNP
بتاتی	tell	VBF
ہیں	Are	AUXT
کہ	that	SC
’	’	PU
شوٹنگ	Shooting	NN
کے	of	PSP
دوران	during	NN
ایک	one	CD
جگہ	place	NN
تھپڑ	slap	NN
مارنے	Kill	VBI
کا	concerning	PSP
سین	Sen	NN
تھا	was	VBF
تو	thou	SC
میں	In	PRP
نے	have	PSP
مطالبہ	demand	NN
کیا	what	VBF
کہ	that	SC
کوئی	any	PDM
کسی	A	PRP
کو	to	PSP
تھپڑ	slap	NN
نہیں	not	NEG
مارے	killed	VBF
گا	would be	AUXT
۔	.	PU
اور	and	CC
میرے	my	PRS
خیال	opinion	NN
سے	from	PSP
ہمارے	Our	PRS
نوجوان	young	JJ
اداکاروں	Actors	NN
کو	to	PSP
بھی	also	PSP
یہ	this	PDM
ذمہ	responsible	NN
داری	dari	NN
لینی	Lenny	NN
چاہیے	Must	VBF
کہ	that	SC
ہم	we	PRP
اپنی	Your	APNA
اداکاری	acting	NN
سٹوری	Story	NN
اور	and	CC
فیم	fam	NN
کے	of	PSP
ساتھ	together	NN
ایک	one	CD
بیانیہ	Descriptive	NN
بنا	Create	VBF
رہے	remain	AUXP
ہوتے	are	VBF
ہیں	Are	AUXT
۔	.	PU
‘	‘	PU
’	’	PU
جتنا	As	Q
آپ	you	PRP
مشہور	famous	JJ
ہوتے	are	VBF
ہو	be	AUXT
اس	this	PDM
کردار	role	NN
کو	to	PSP
لوگ	people	NN
اتنا	so	Q
ہی	hey	NN
سنجیدگی	seriousness	NN
سے	from	PSP
لیتے	Take	VBF
ہیں	Are	AUXT
۔	.	PU
بچوں	Children	NN
کو	to	PSP
ذمہ	responsible	NN
داری	dari	NN
لینی	Lenny	NN
چاہیے	Must	VBF
کہ	that	SC
پولیٹیکلی	politically	NN
کوریکٹ	Corict	NN
چیز	thing	NN
کیا	what	VBF
ہے	Is	AUXT
۔	.	PU
اب	now	NN
ہم	we	PRP
پولیٹیکلی	politically	NN
اِنکوریکٹ	Incorect	NN
برداشت	Bear	NN
نہیں	not	NEG
کر	do	VBF
سکتے	can	AUXM
۔	.	PU
کیونکہ	because	SC
آپ	you	PRP
کی	of	PSP
فوراً	right away	RB
ٹرولنگ	trolling	NN
شروع	beginning	NN
ہو	be	VBF
جاتی	jati	AUXA
ہے	Is	AUXT
جو	who	PRR
کہ	that	SC
ایک	one	CD
طرح	like	NN
سے	from	PSP
ٹھیک	well	JJ
بھی	also	PSP
ہے	Is	VBF
لیکن	but	CC
ہمیں	We	PRP
بہت	very	Q
ذمہ	responsible	NN
دار	dardar	NN
ہونے	be	VBI
کی	of	PSP
ضرورت	need	NN
ہے	Is	VBF
۔	.	PU
‘	‘	PU
ان	them	PRP
کا	concerning	PSP
کہنا	say	VBI
ہے	Is	AUXT
کہ	that	SC
’	’	PU
مجھے	me	PRP
کبھی	ever	NN
کوئی	any	PDM
تشدد	violence	NN
کرنے	To	VBI
کا	concerning	PSP
کہے	Say	VBF
یا	or	CC
میرے	my	PRS
پر	on	PSP
ہو	be	VBF
رہا	remained	AUXP
ہو	be	AUXT
تو	thou	SC
میں	In	PRP
اس	this	PRP
سے	from	PSP
اتفاق	coincidence	NN
نہیں	not	NEG
کرتی	dorm	VBF
۔	.	PU
میں	In	PRP
نے	have	PSP
کوشش	attempt	NN
کی	of	VBF
پہلے	before	NN
تو	thou	SC
عقل	mind	NN
نہیں	not	NEG
ہوتی	would have	VBF
تھی	had been	AUXT
آپ	you	PRP
بڑی	Large	JJ
چیزیں	Things	NN
کر	do	VBF
جاتے	go	AUXA
تھے	were	AUXT
۔	.	PU
اس	this	PRP
عمر	age	NN
میں	In	PSP
جا	Be	VBF
کر	do	SCK
عقل	mind	NN
آتی	coming	VBF
ہے	Is	AUXT
تو	thou	SC
آپ	you	PRP
ذمہ	responsible	NN
دار	dardar	NN
ہو	be	VBF
جاتے	go	AUXA
ہیں	Are	AUXT
۔	.	PU
‘	‘	PU
’	’	PU
آج	today	NN
کل	tomorrow	NN
کے	of	PSP
اداکاروں	Actors	NN
کے	of	PSP
نخرے	tantrums	NN
زیادہ	more	Q
ہے	Is	VBF
ان	them	PRP
کو	to	PSP
الگ	apart	JJ
[truncated: 117,277 more rows]
